# Supplementary material for: The quenching of fluorescence as an indicator of donor-strength in meso arylethynyl BODIPYs
Source: Royal Society of Chemistry journal article supplement (doi:10.1039/c3dt53056f), 2013-12-19
Supplement: c3dt53056f.pdf [file c3dt53056f.pdf]

## Supporting Information

# Quenching of fluorescence as an indicator of donor-strength in *meso* arylethynyl BODIPYs

*Rajneesh Misra, \* Bhausheb Dhokale, Thaksen Jadhav, Shaikh M. Mobin*

\*E-mail: rajneeshmisra@iiti.ac.in

*Department of Chemistry,  
Indian Institute of Technology Indore,  
Indore- 452 017, India.*

## Table of Contents

|             |                                                                                                    |            |
|-------------|----------------------------------------------------------------------------------------------------|------------|
| <b>I.</b>   | <b>Crystallographic data</b> .....                                                                 | <b>S3</b>  |
| <b>II.</b>  | <b>Photophysical Data</b> .....                                                                    | <b>S7</b>  |
| <b>III.</b> | <b>Electrochemical Data</b> .....                                                                  | <b>S8</b>  |
| <b>IV.</b>  | <b>Copies of <sup>1</sup>H NMR, <sup>13</sup>C NMR and HRMS Spectra of the New Compounds</b> ..... | <b>S13</b> |
| <b>V.</b>   | <b>Theoretical Calculations</b> .....                                                              | <b>S37</b> |
|             | <b>References</b> .....                                                                            | <b>S58</b> |

### Single Crystal X-ray Diffraction Studies.

Single crystal X-ray structural studies of **2d** and **2e** were performed on a CCD Agilent Technologies (Oxford Diffraction) SUPER NOVA diffractometer. Data were collected at 150(2) K using graphite-monochromated CuK $\alpha$  radiation ( $\lambda_{\alpha} = 1.5418 \text{ \AA}$ ). The strategy for the Data collection was evaluated by using the CrysAlisPro CCD software. The data were collected by the standard 'phi-omega scan techniques, and were scaled and reduced using CrysAlisPro RED software. The structures were solved by direct methods using SHELXS-97, and refined by full matrix least-squares with SHELXL-97, refining on  $F^2$ .<sup>1</sup> The positions of all the atoms were obtained by direct methods. All non-hydrogen atoms were refined anisotropically. The remaining hydrogen atoms were placed in geometrically constrained positions, and refined with isotropic temperature factors, generally  $1.2U_{eq}$  of their parent atoms. The crystal structure, and data refinement parameters are summarized in Table 1. The CCDC numbers 967406, and 967407 contain the supplementary crystallographic data for **2d** and **3e** respectively. These data can be obtained free of charge via [www.ccdc.cam.ac.uk/conts/retrieving.html](http://www.ccdc.cam.ac.uk/conts/retrieving.html) (or from the Cambridge Crystallographic Data Centre, 12 union Road, Cambridge CB21 EZ, UK; Fax: (+44) 1223-336-033; or [deposit@ccdc.cam.ac.uk](mailto:deposit@ccdc.cam.ac.uk)).

**Table S1.** Crystal structure and data refinement parameters

| BODIPY                                               | <b>2d</b>                                                           | <b>2e</b>                                                           |
|------------------------------------------------------|---------------------------------------------------------------------|---------------------------------------------------------------------|
| Empirical formula                                    | C <sub>21</sub> H <sub>13</sub> B F <sub>2</sub> N <sub>2</sub>     | C <sub>21</sub> H <sub>13</sub> B F <sub>2</sub> N <sub>2</sub>     |
| Formula weight                                       | 342.14                                                              | 342.14                                                              |
| Temperature/K                                        | 150(2)                                                              | 150(2)                                                              |
| Crystal system                                       | Orthorhombic                                                        | Monoclinic                                                          |
| Space group                                          | <i>P2<sub>1</sub>2<sub>1</sub>2<sub>1</sub></i>                     | <i>P2/c</i>                                                         |
| Unit cell dimensions                                 |                                                                     |                                                                     |
| a/Å                                                  | a = 5.5995(2)                                                       | a = 10.1059(3)                                                      |
| α/°                                                  | 90                                                                  | 90                                                                  |
| b/Å                                                  | 13.5098(4)                                                          | b = 10.4411(3)                                                      |
| β/°                                                  | 90                                                                  | 100.699(3)                                                          |
| c/Å                                                  | 22.2683(8)                                                          | 15.6091(5)                                                          |
| γ/°                                                  | 90                                                                  | 90                                                                  |
| Volume/ Å <sup>3</sup>                               | 1684.56(10)                                                         | 1618.39(8)                                                          |
| Z                                                    | 4                                                                   | 4                                                                   |
| Calculated density/ Mg/m <sup>3</sup>                | 1.349                                                               | 1.404                                                               |
| Absorption coefficient/mm <sup>-1</sup>              | 0.779                                                               | 0.811                                                               |
| <i>F</i> (000)                                       | 704                                                                 | 704                                                                 |
| Crystal size/mm                                      | 0.21 x 0.18 x<br>0.13                                               | 0.33 x 0.26 x 0.19                                                  |
| θ range from data collection/°                       | 3.83 to 72.10                                                       | 4.23 to 72.16                                                       |
| Reflections collected/unique                         | 11102 / 3269<br>[ <i>R</i> (int) = 0.0166]                          | 10226 / 3147 [ <i>R</i> (int) =<br>0.0239]                          |
| Absorption correction                                | Semi-empirical<br>from equivalents                                  | Semi-empirical from<br>equivalents                                  |
| Data/restraints/parameters                           | 3269 / 0 / 236                                                      | 3147 / 0 / 236                                                      |
| Goodness-of-fit on <i>F</i> <sup>2</sup>             | 1.023                                                               | 1.090                                                               |
| Final <i>R</i> indices [ <i>I</i> > 2σ ( <i>I</i> )] | <i>R</i> <sub>1</sub> = 0.0281,<br>w <i>R</i> <sub>2</sub> = 0.0735 | <i>R</i> <sub>1</sub> = 0.0427,<br>w <i>R</i> <sub>2</sub> = 0.1244 |
| <i>R</i> indices (all data)                          | <i>R</i> <sub>1</sub> = 0.0336,<br>w <i>R</i> <sub>2</sub> = 0.0788 | <i>R</i> <sub>1</sub> = 0.0519,<br>w <i>R</i> <sub>2</sub> = 0.1387 |
| Largest diff. peak and hole/e<br>Å <sup>-3</sup>     | 0.081 and -0.099                                                    | 0.198 and -0.207                                                    |
| Absolute structure parameter                         | 0.10(14)                                                            | -                                                                   |
| CCDC number                                          | 967406                                                              | 967407                                                              |

**Table S2.** Selected torsional angles obtained from crystal structure and theoretical calculations

| BODIPY                      | <b>2d</b> | <b>2e</b> |
|-----------------------------|-----------|-----------|
| Torsional angle             | 4.97      | 2.68      |
| Theoretical torsional angle | 0.23      | 13.43     |

**Table S3.** Distance and angle of intermolecular of interactions in the crystal structures.

| Interaction                              | Distance (Å) | Angle of Interaction (°) |
|------------------------------------------|--------------|--------------------------|
| <b>2d</b>                                |              |                          |
| F(1)---H(7)-C(7)                         | 2.355        | 131.08                   |
| F(1)---H(21)-C(21)                       | 2.285        | 128.27                   |
| F(2)---H(9)-C(9)                         | 2.627        | 119.94                   |
| C(17)-H(17)--- $\pi$ (pyrrolic)          | 3.044        |                          |
| $\pi$ --- $\pi$ between two BODIPY units | 3.383        |                          |
| <b>2e</b>                                |              |                          |
| F(1)---H(9)-C(9)                         | 2.467        | 160.18                   |
| F(2)---H(18)-C(18)                       | 2.527        | 156.97                   |
| $\pi$ --- $\pi$ between two BODIPY units | 3.384        |                          |

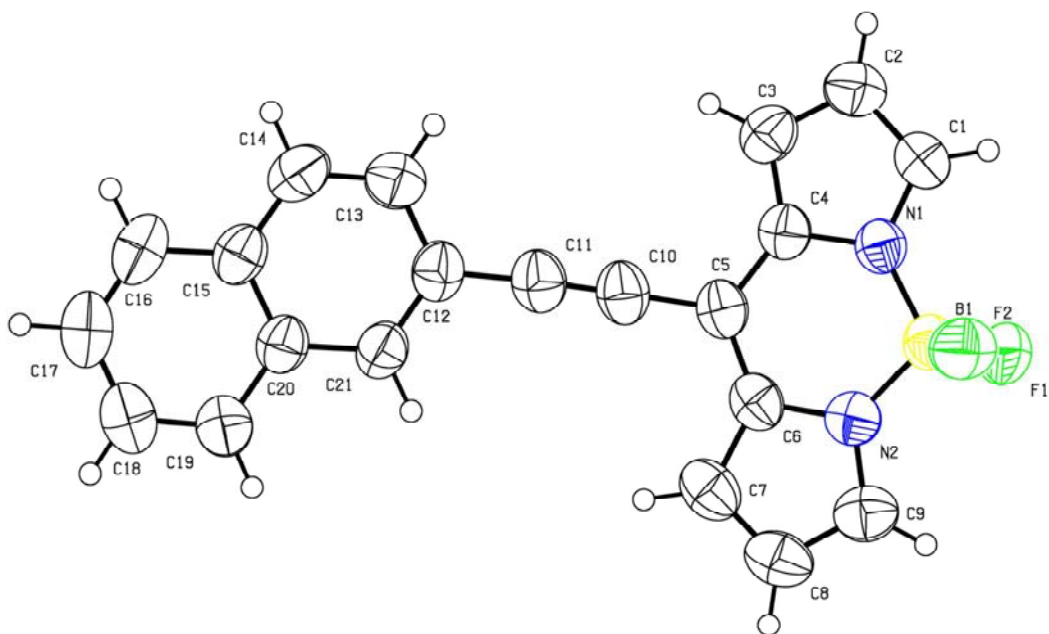

**Figure S1.** Crystal structure of **2d**

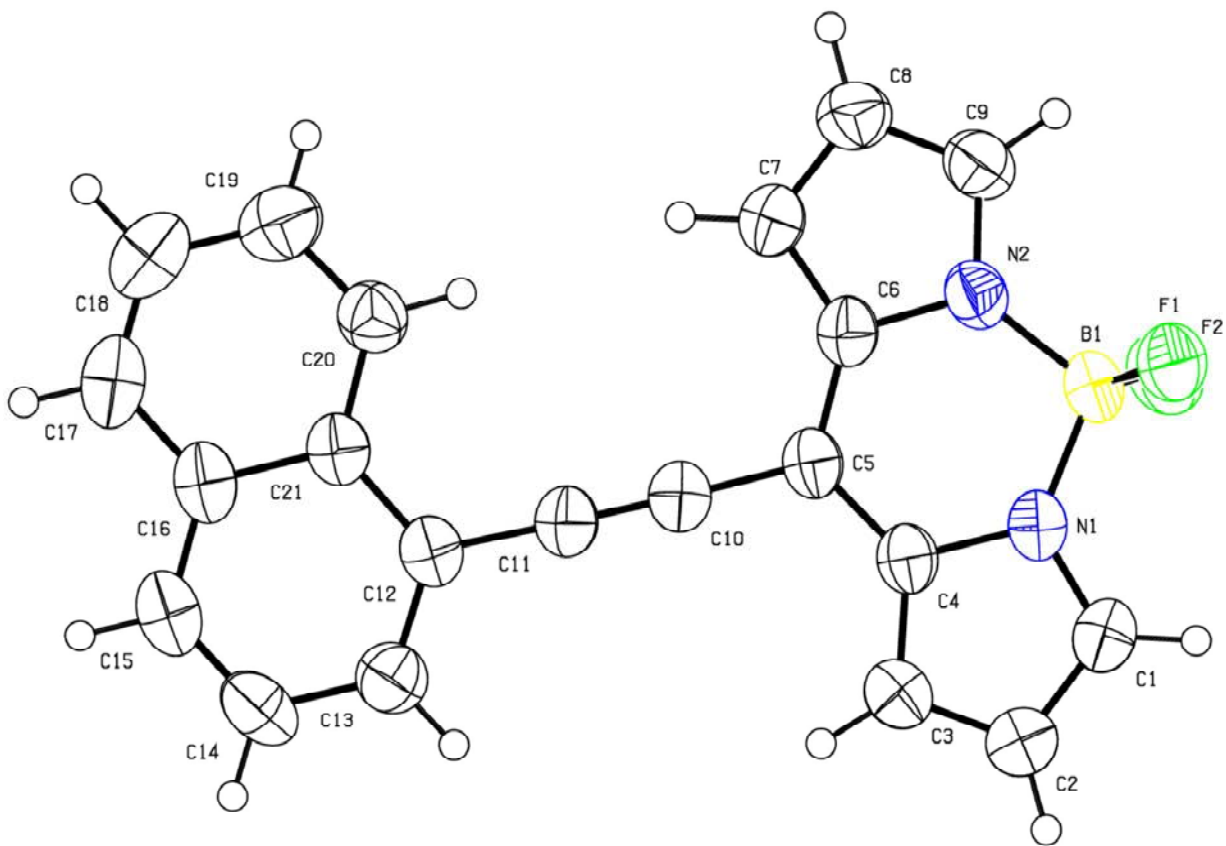

**Figure S2.** Crystal structure of **2e**

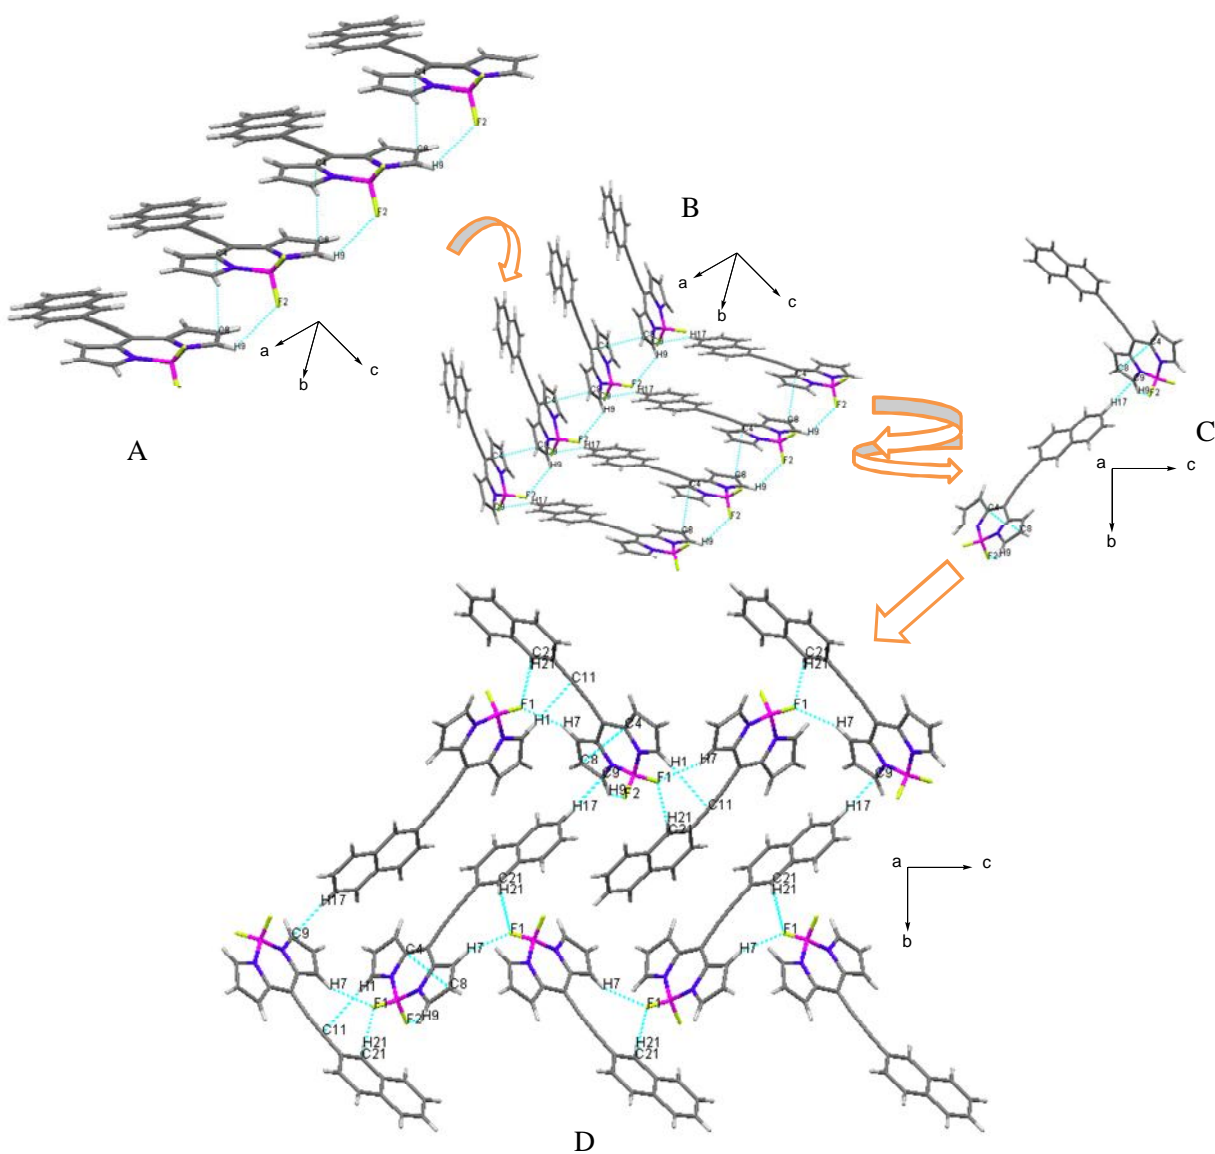

**Figure S3.** Crystal structure packing of **2d**.

***The fluorescence quantum yields ( $\phi_F$ )***

The fluorescence quantum yields ( $\phi_F$ ) of compounds **2-6** were calculated by the steady-state comparative method using Rhodamine 6G as a standard ( $\phi_{st} = 0.88$ , ethanol).<sup>1</sup>

$$\Phi_F = \Phi_{st} \times S_u/S_{st} \times A_{st} / A_u \times n_{Du}^2/n_{Dst}^2 \dots\dots\dots (Eq. 1)$$

Where  $\Phi_F$  is the emission quantum yield of the sample,  $\Phi_{st}$  is the emission quantum yield of the standard,  $A_{st}$  and  $A_u$  represent the absorbance of the standard and sample at the excitation wavelength, respectively, while  $S_{st}$  and  $S_u$  are the integrated emission band areas of the standard and sample, respectively, and  $n_{Dst}$  and  $n_{Du}$  the solvent refractive index of the standard and sample, u and st refer to the unknown and standard, respectively.

### Electrochemical Characterizations

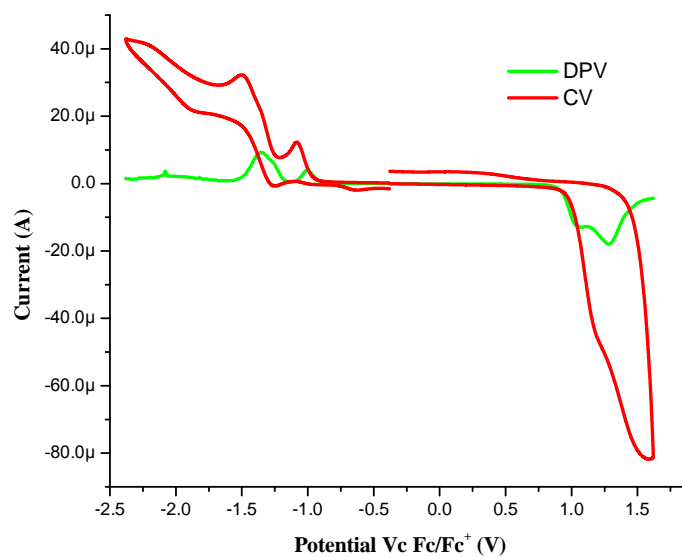

**Figure S4.** CV and DPV plots of of *meso*-arylethynyl BODIPY **2a**.



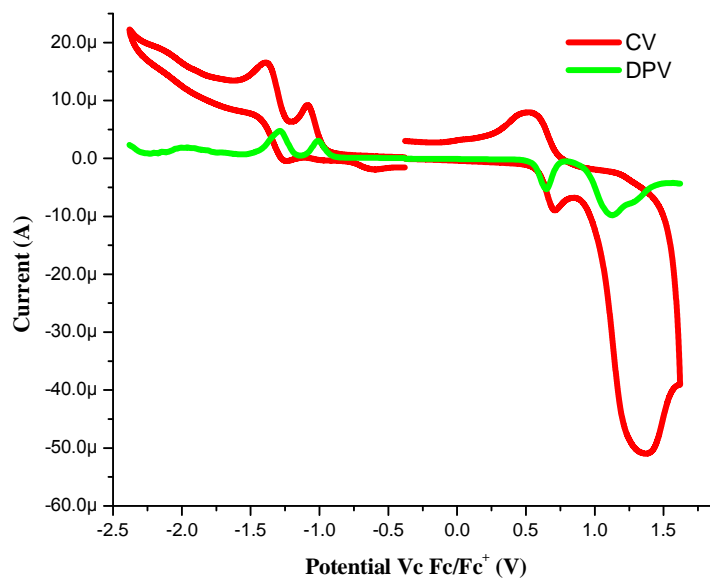

**Figure S5.** CV and DPV plots of of *meso*-arylethynyl BODIPY 2b.

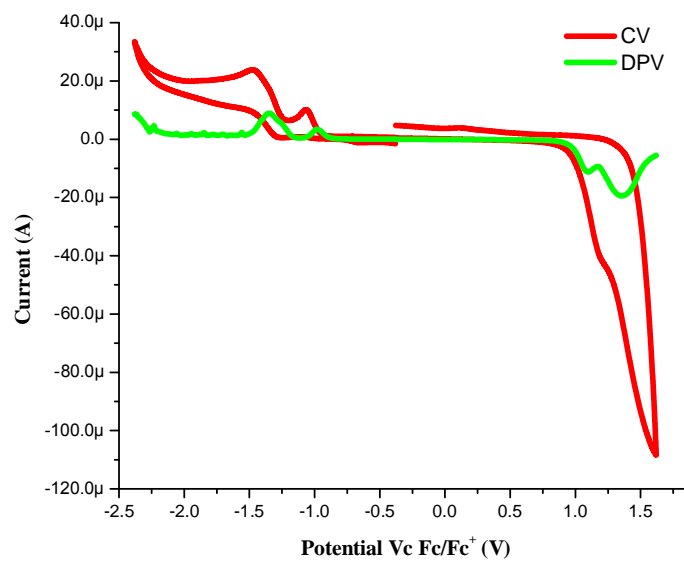

**Figure S6.** CV and DPV plots of of *meso*-arylethynyl BODIPY 2c.

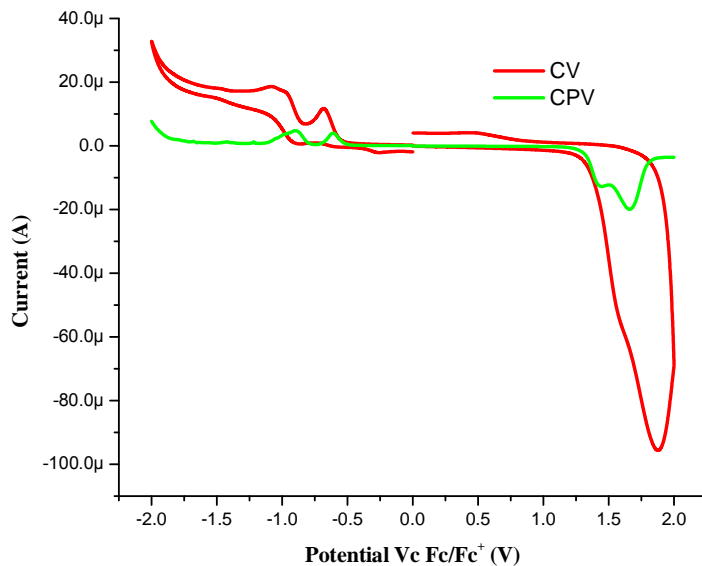

**Figure S7.** CV and DPV plots of of *meso*-arylethynyl BODIPY **2d**.

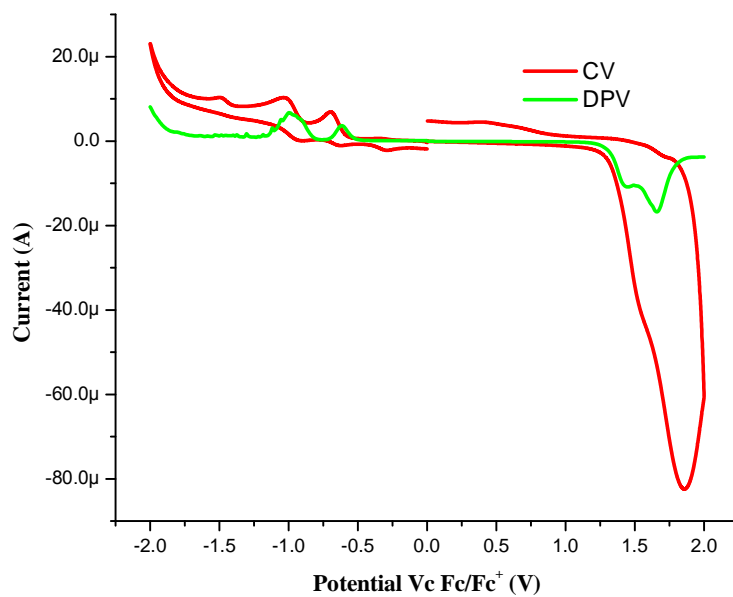

**Figure S8.** CV and DPV plots of of *meso*-arylethynyl BODIPY **2e**.

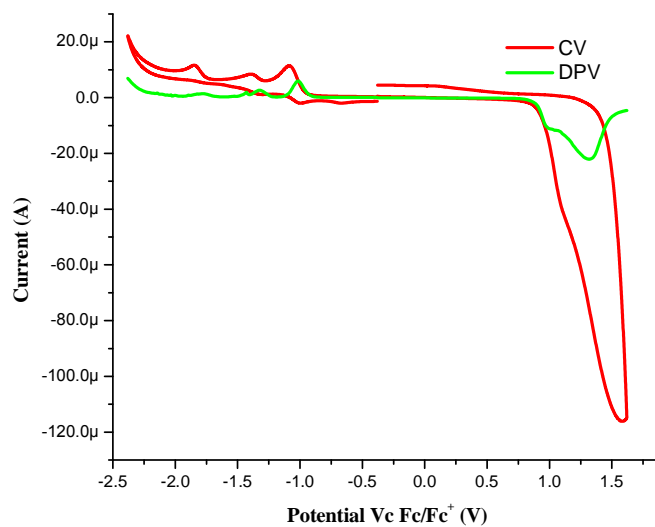

**Figure S9.** CV and DPV plots of *meso*-arylethynyl BODIPY **2f**.

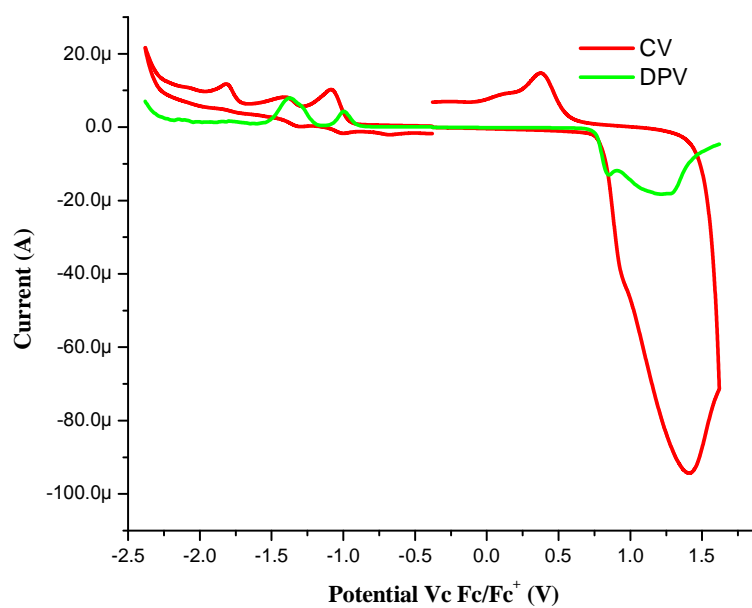

**Figure S10.** CV and DPV plots of *meso*-arylethynyl BODIPY **2g**.

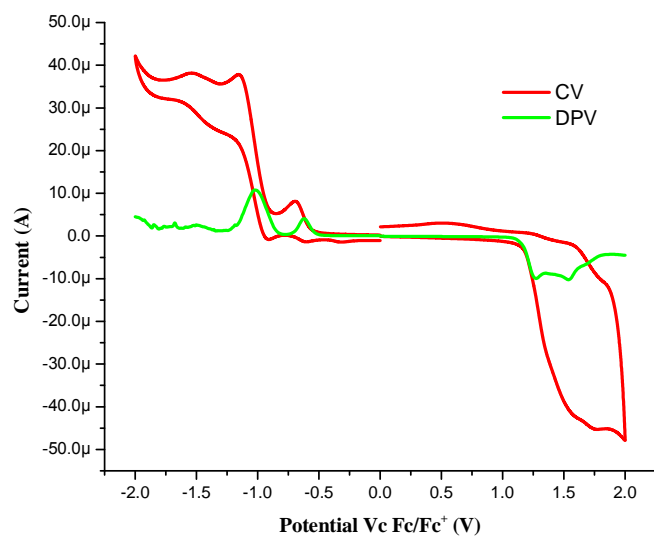

**Figure S11.** CV and DPV plots of *meso*-arylethynyl BODIPY **2h**.

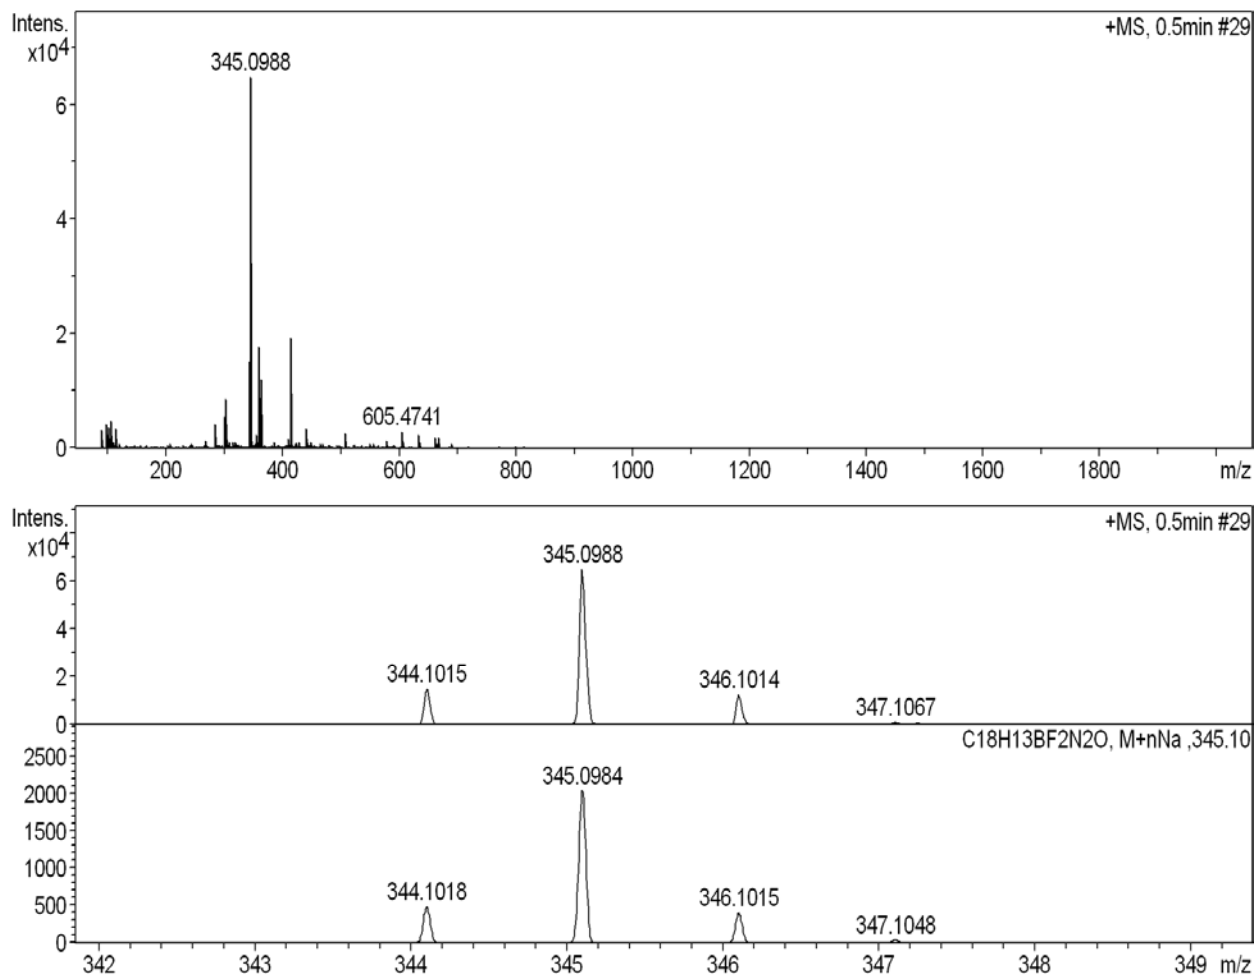

HRMS spectra of **2a**

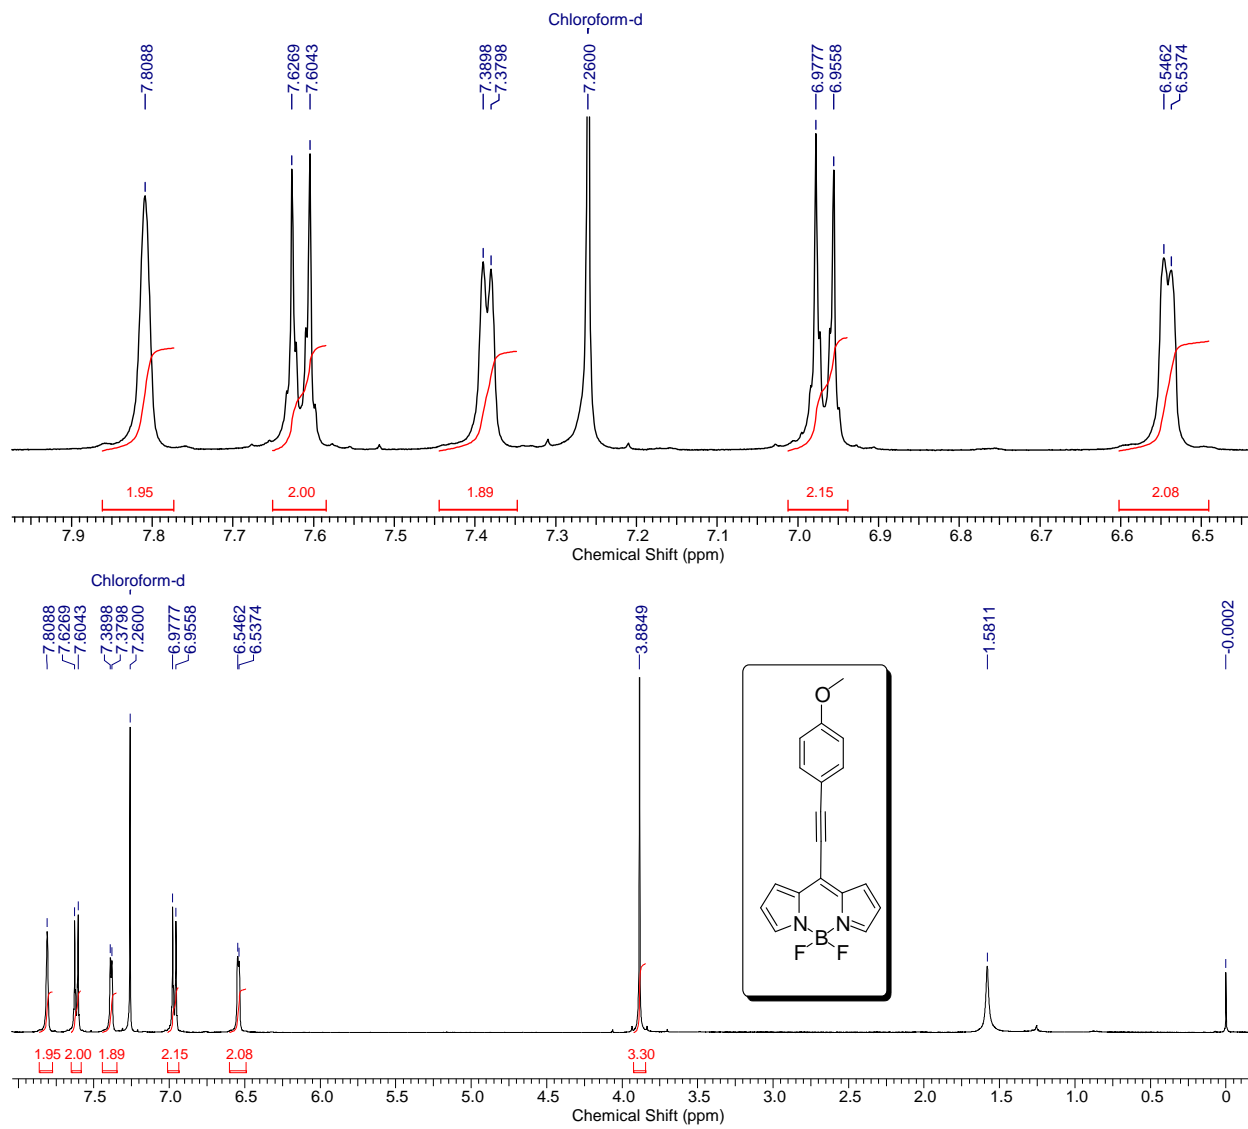

$^1\text{H}$  NMR spectra of **2a**

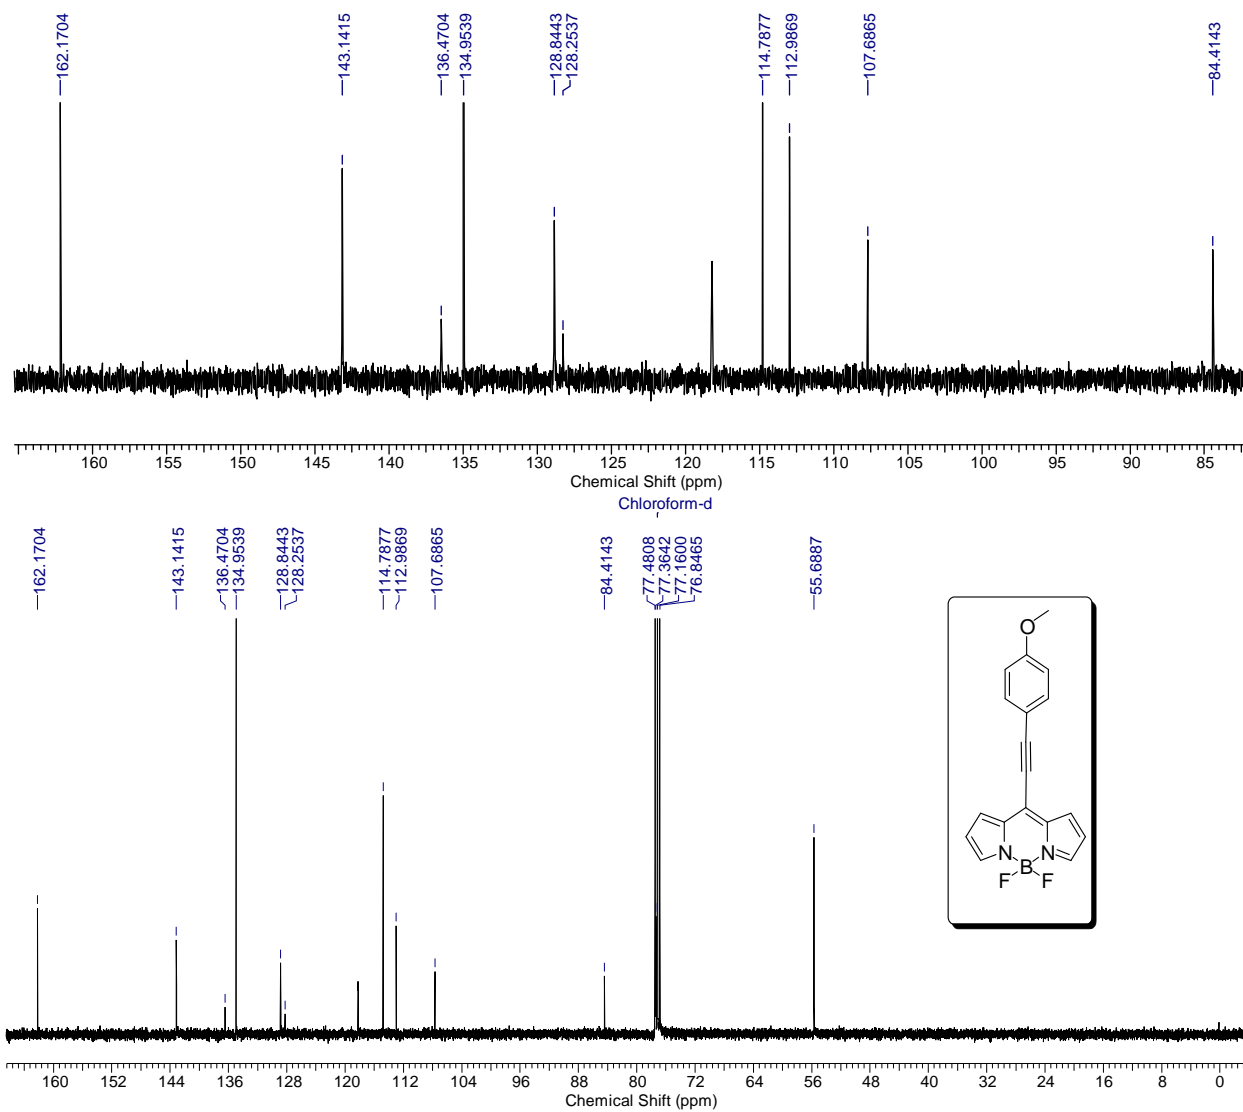

$^{13}\text{C}$  NMR spectra of **2a**

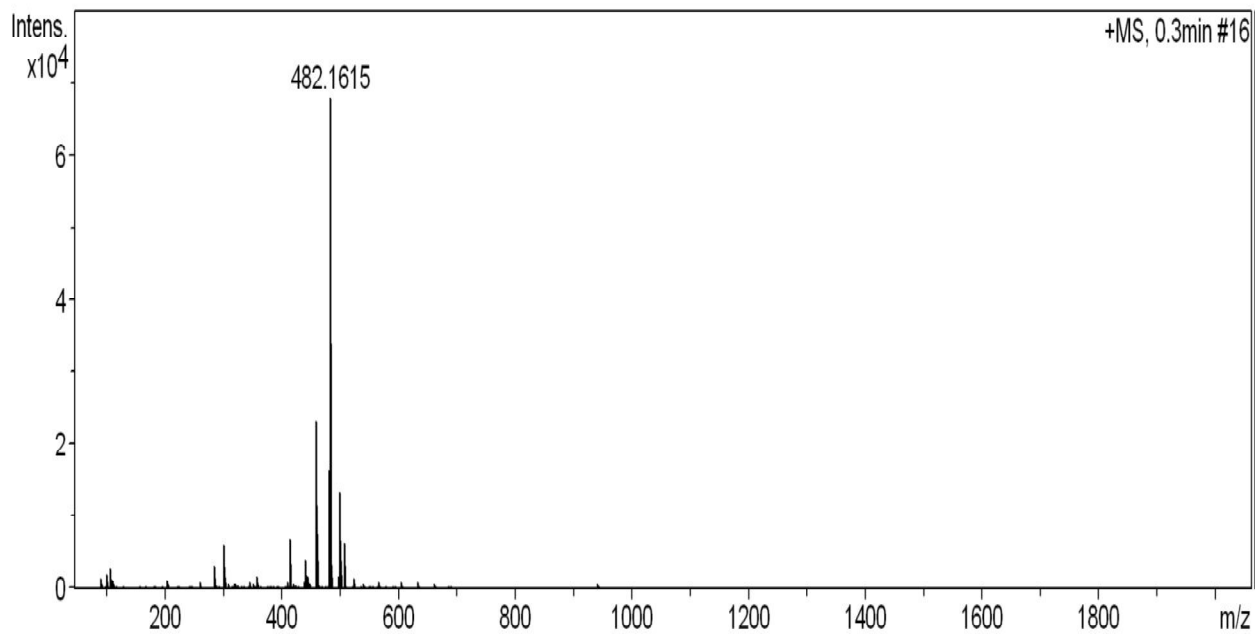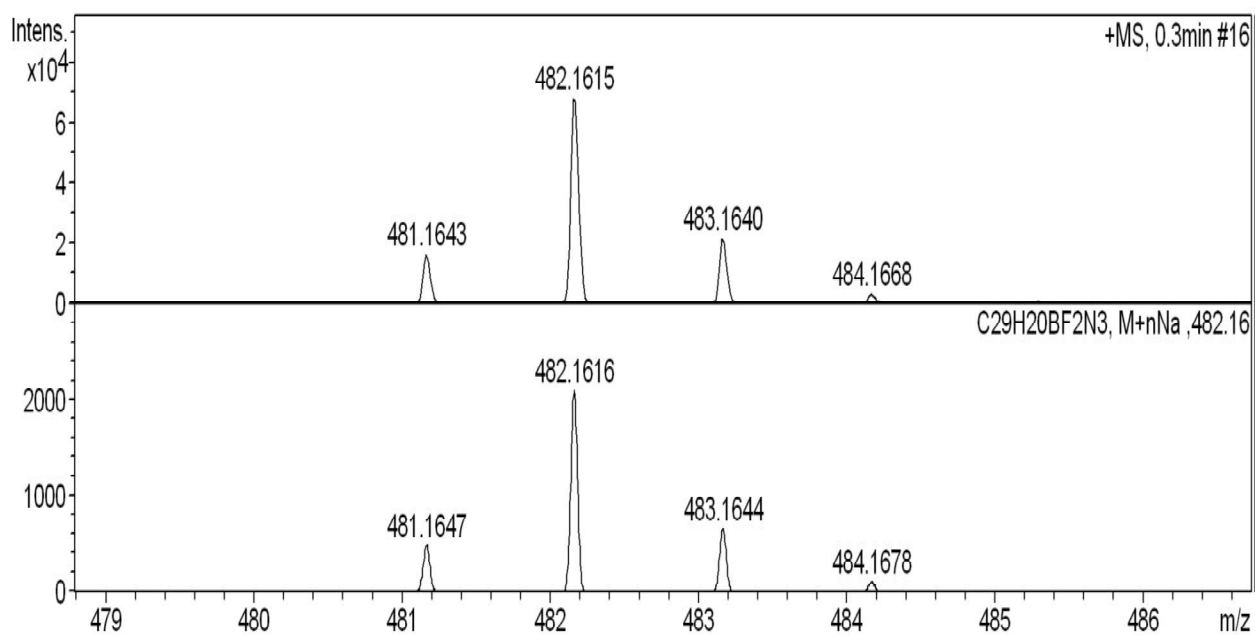

HRMS spectra of **2b**



13 Oct 2013

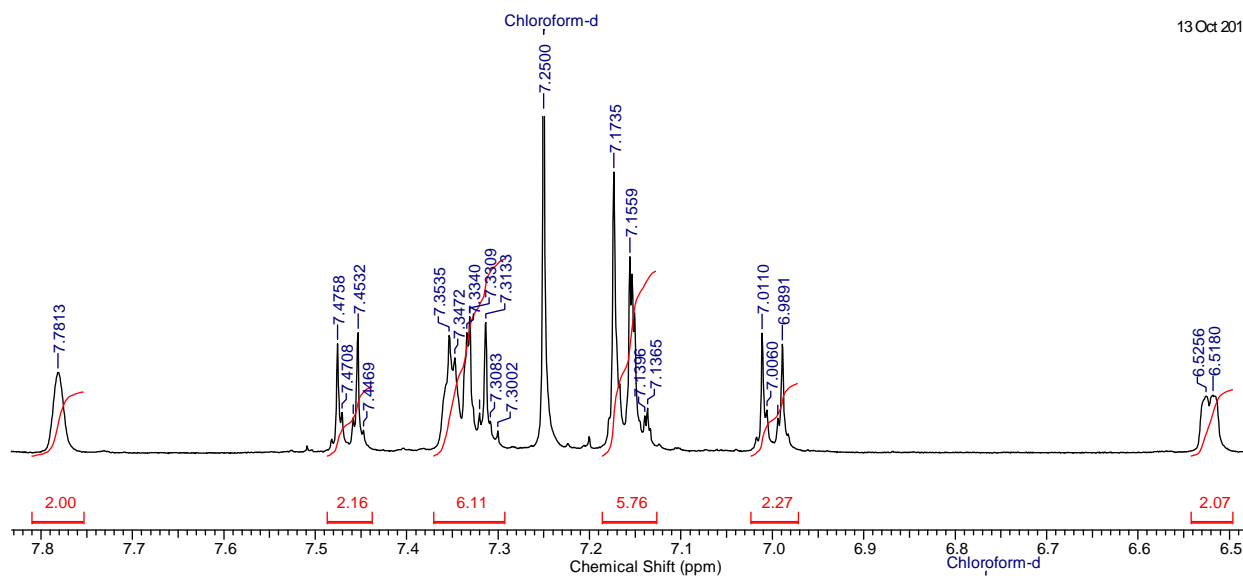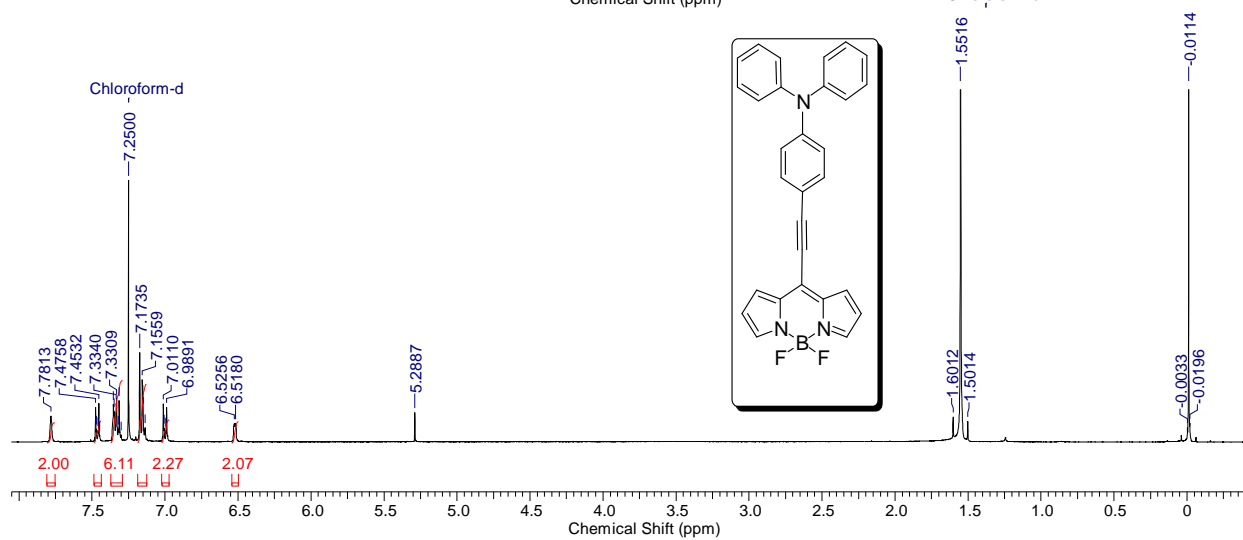

$^1\text{H}$  NMR spectra of **2b**

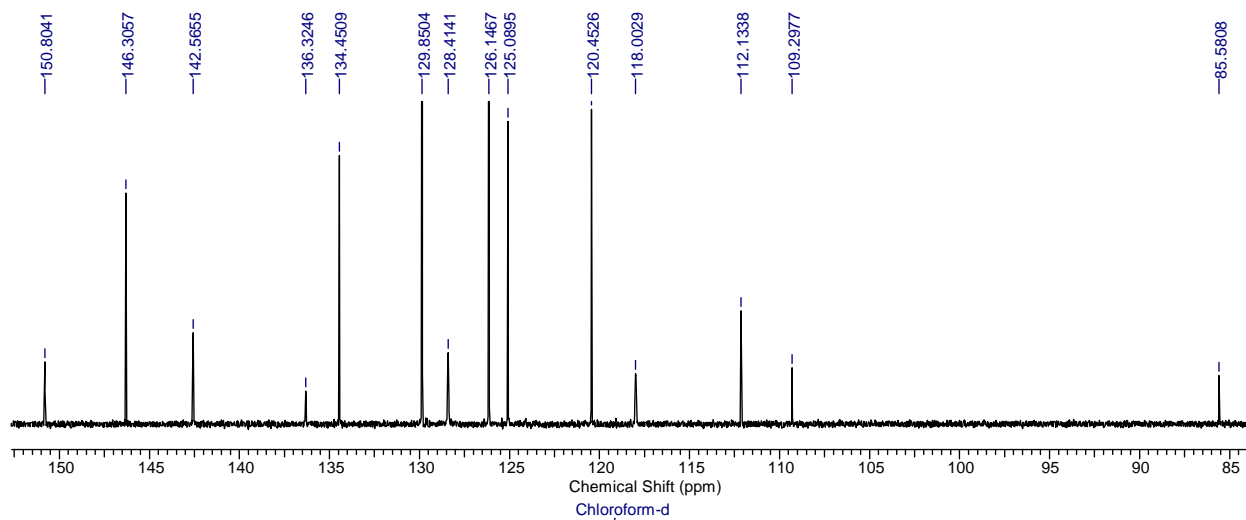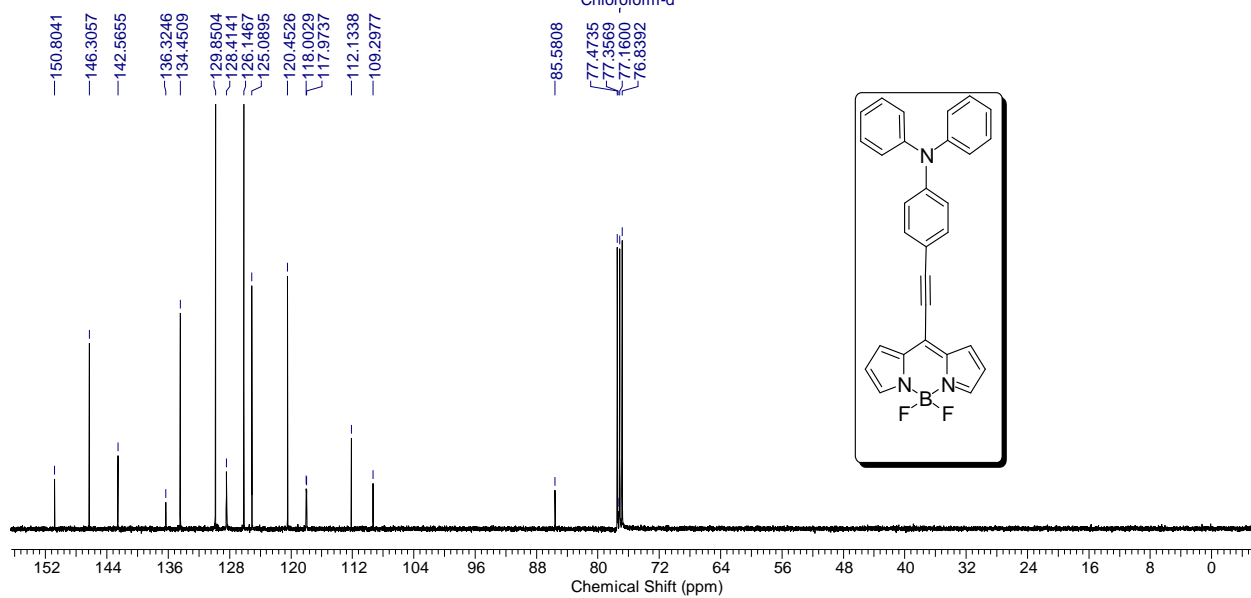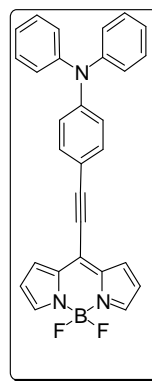

$^{13}\text{C}$  NMR spectra of **2b**

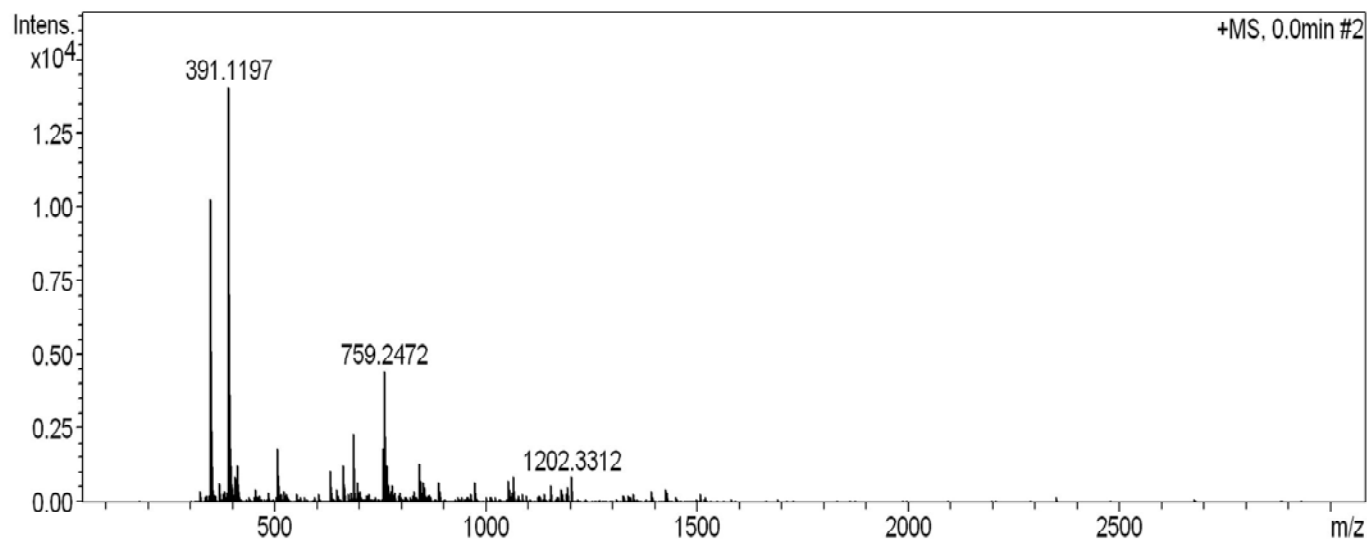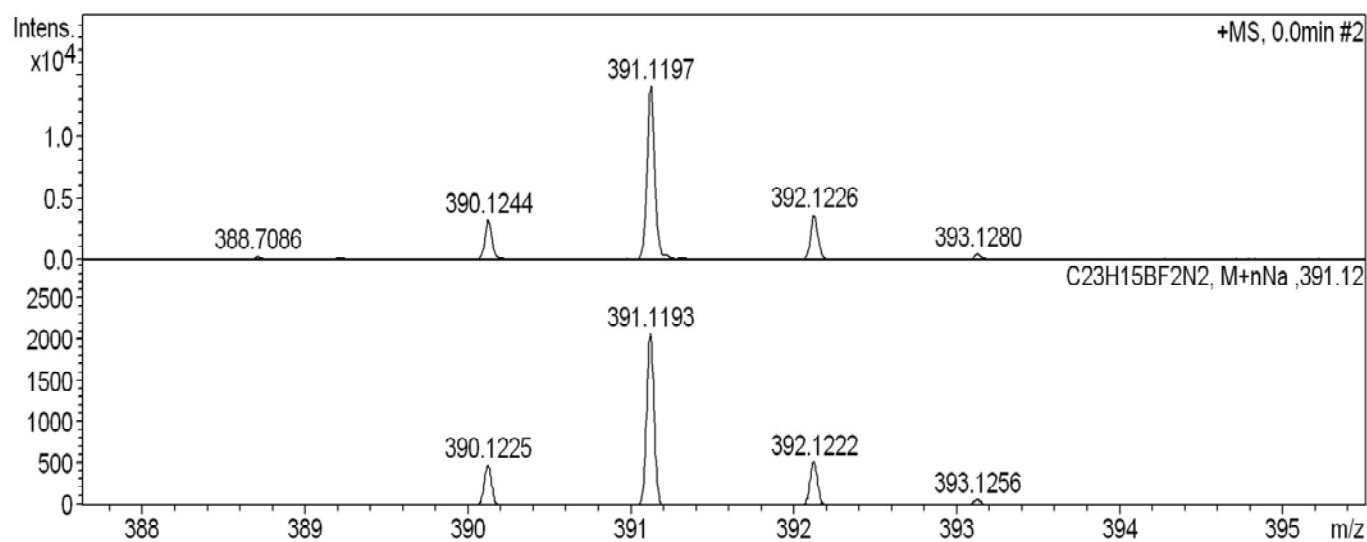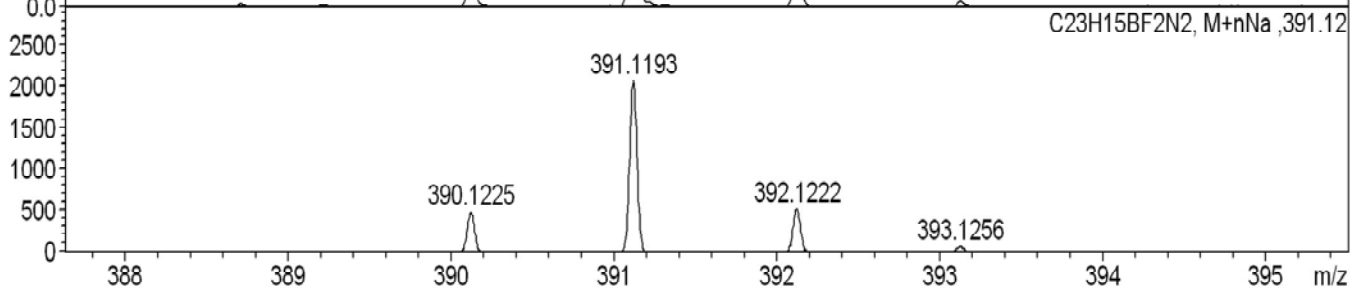

HRMS spectra of **2c**

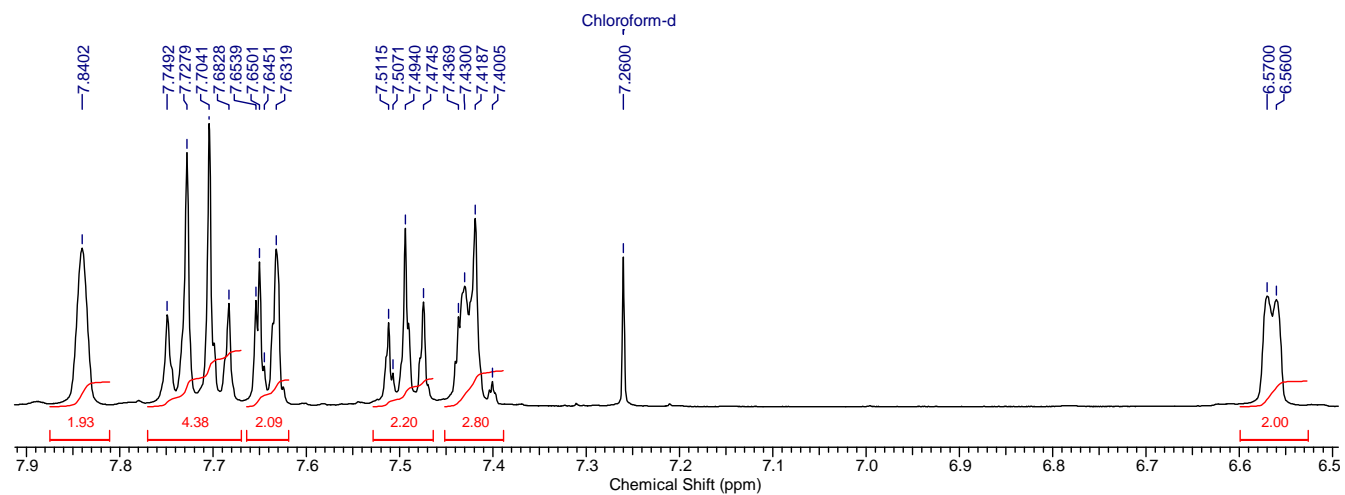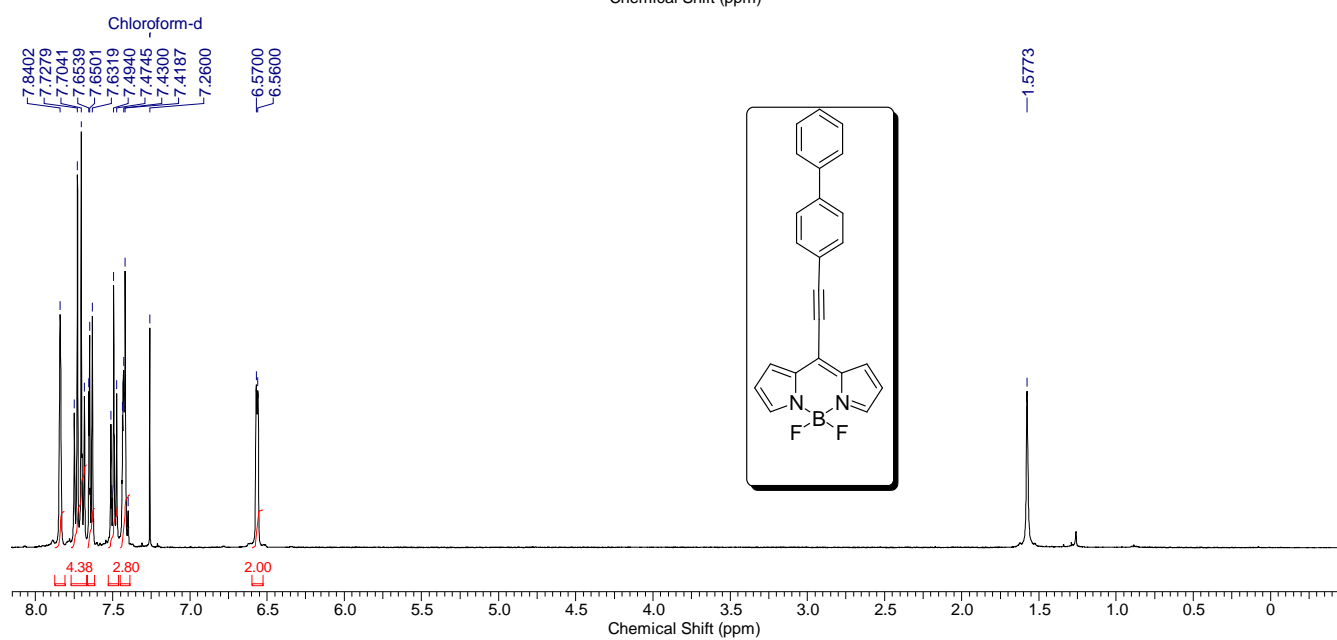

$^1\text{H}$  NMR spectra of **2c**

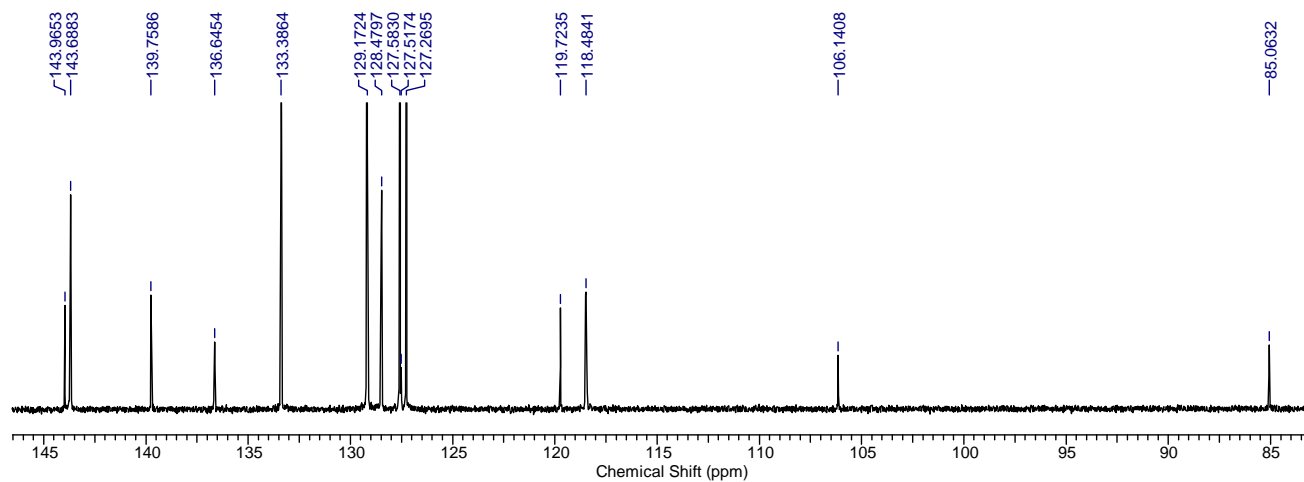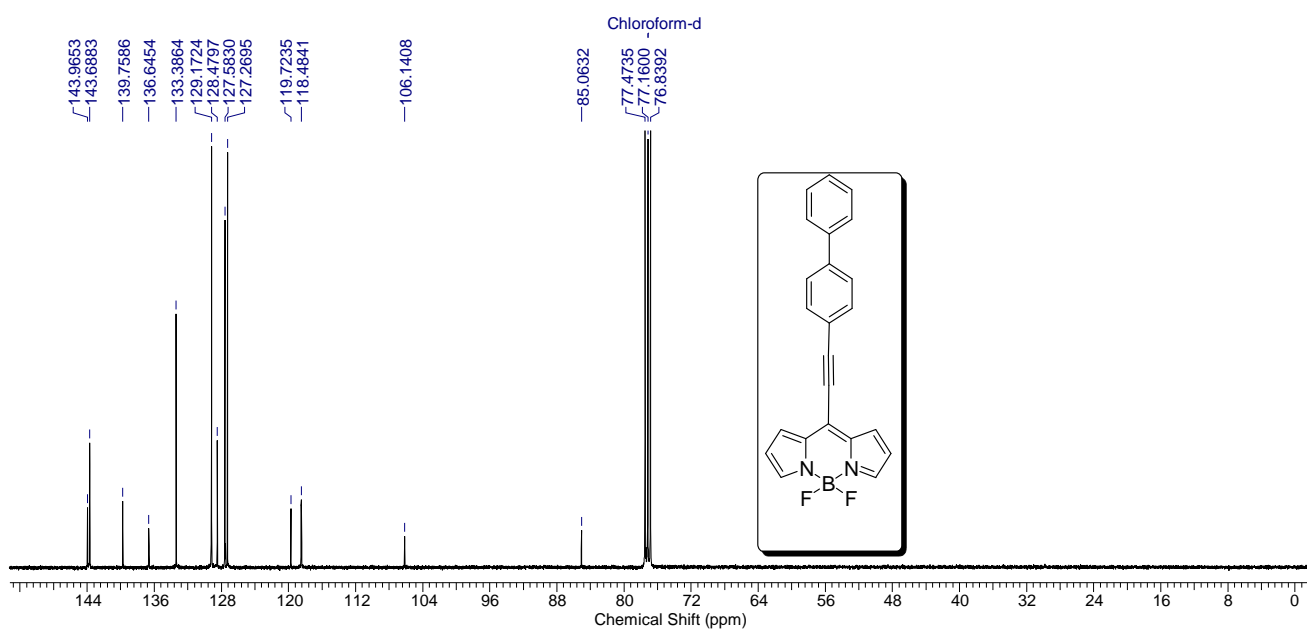

$^{13}\text{C}$  NMR spectra of **2c**

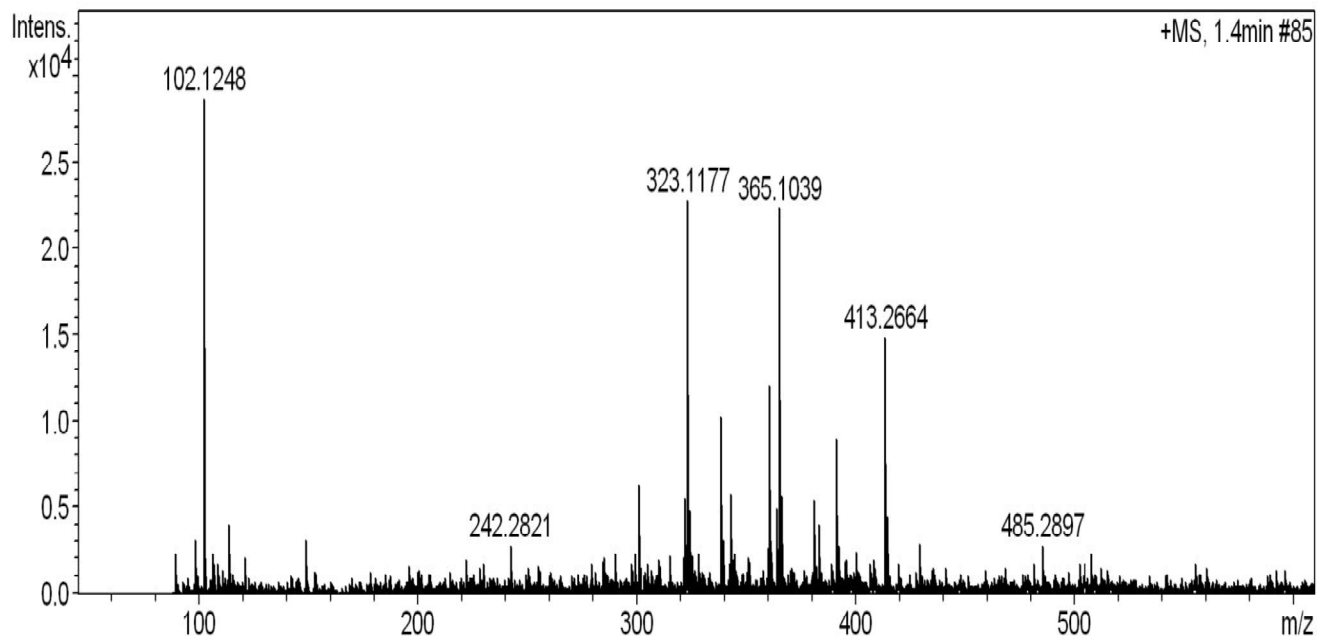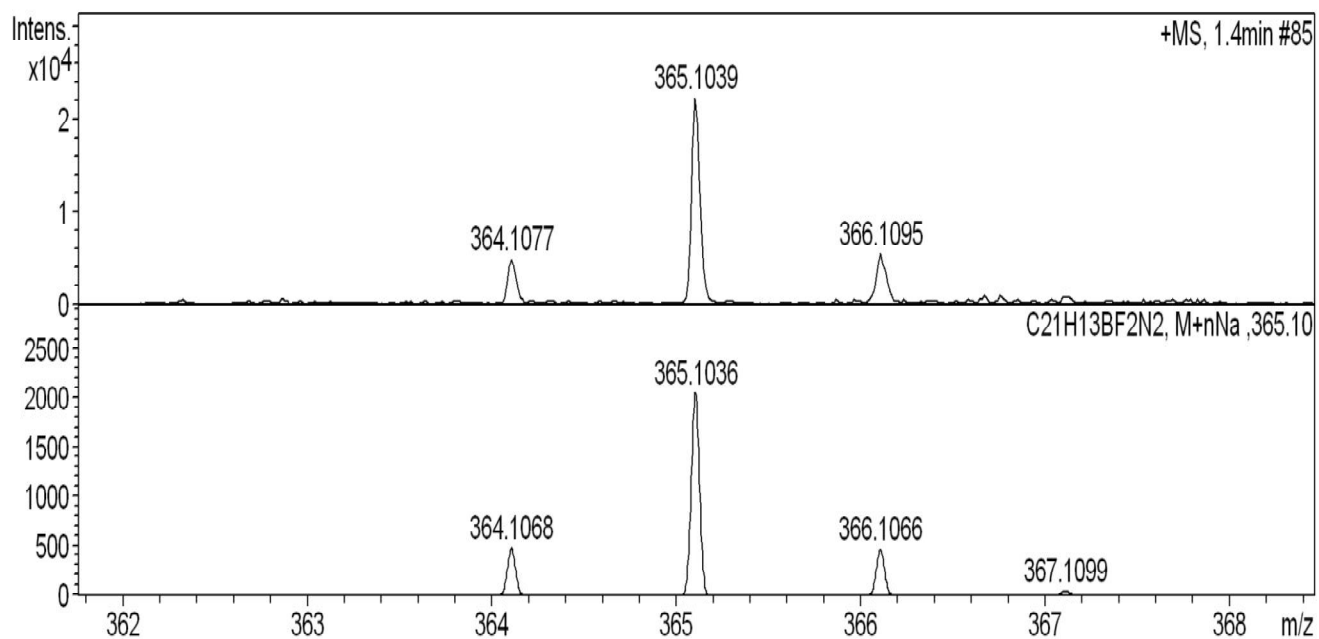

HRMS spectra of **2d**

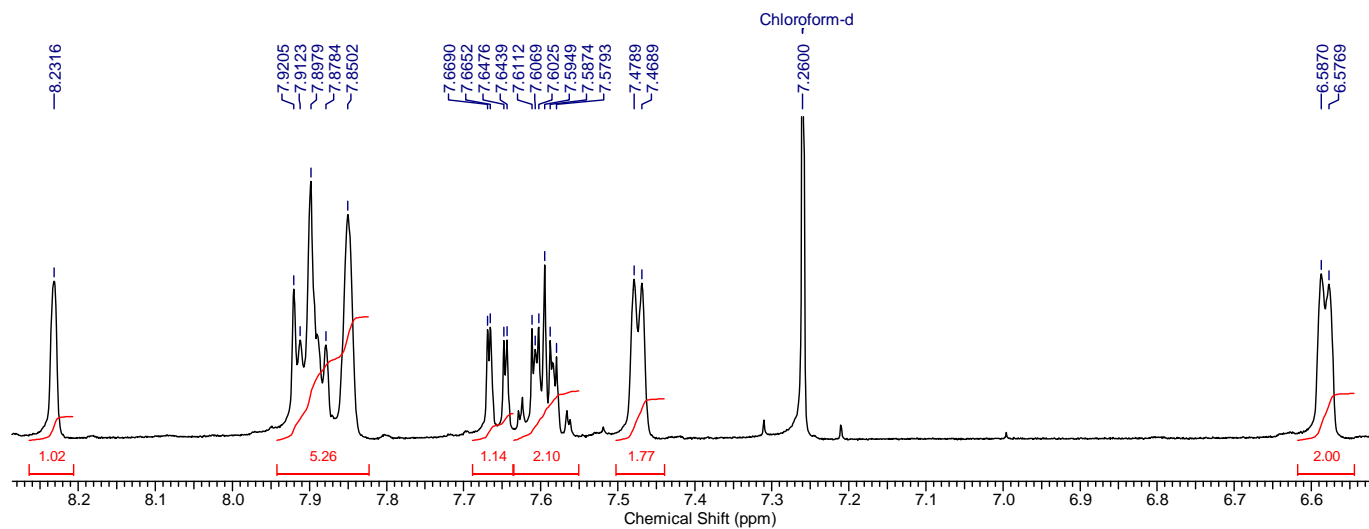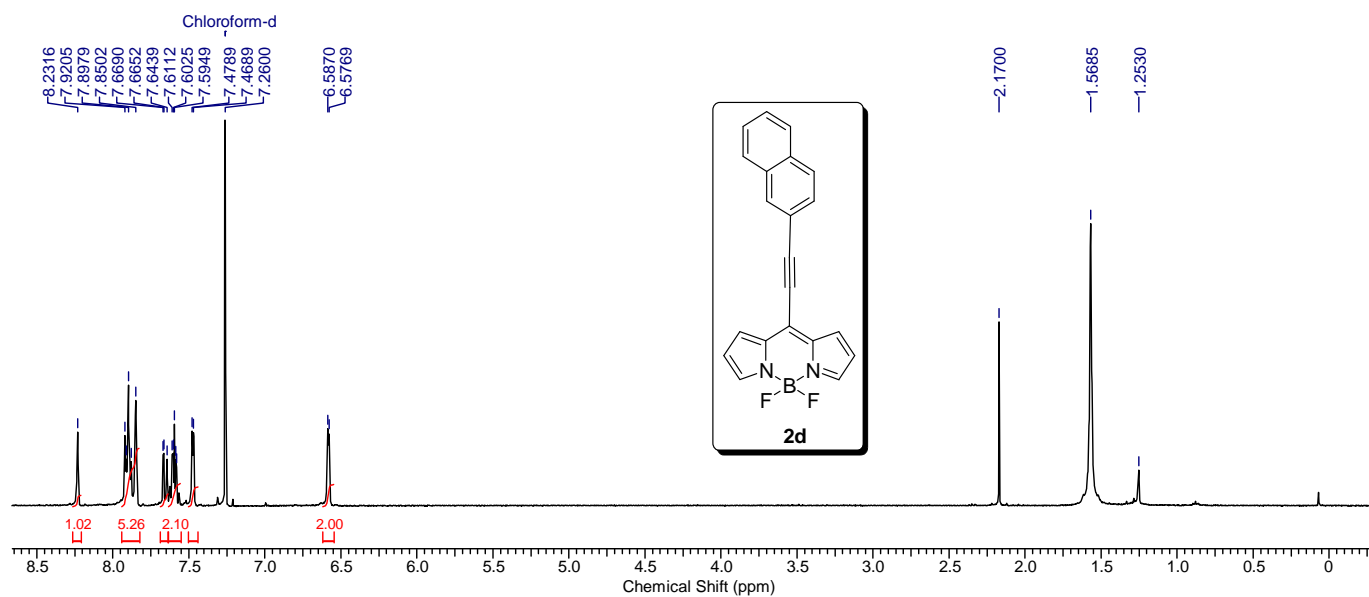

$^1\text{H}$  NMR spectra of **2d**

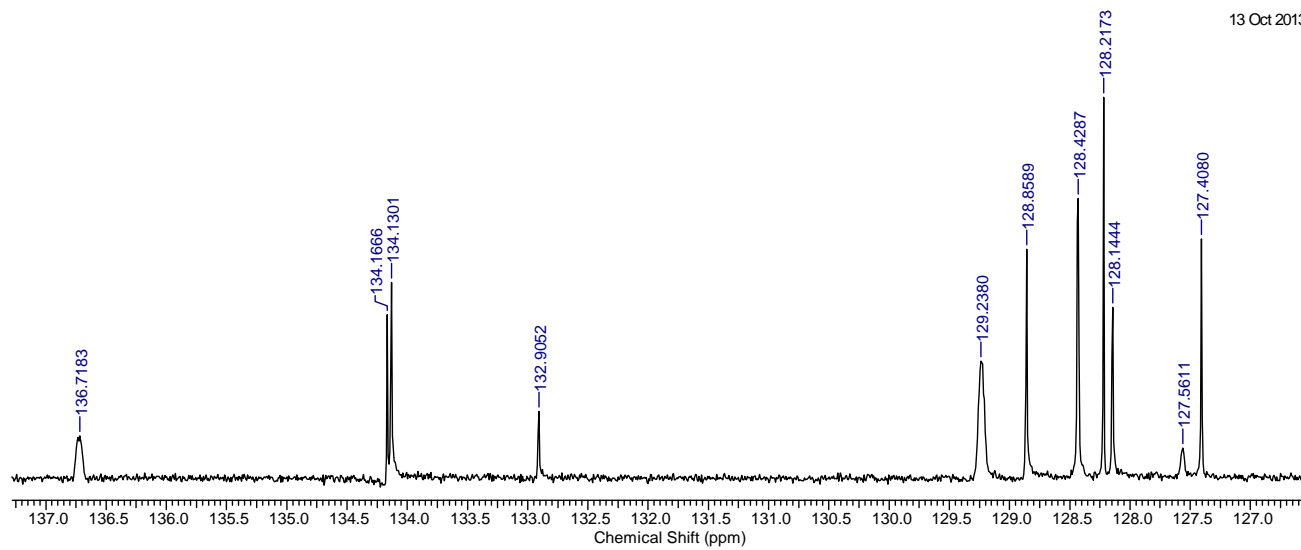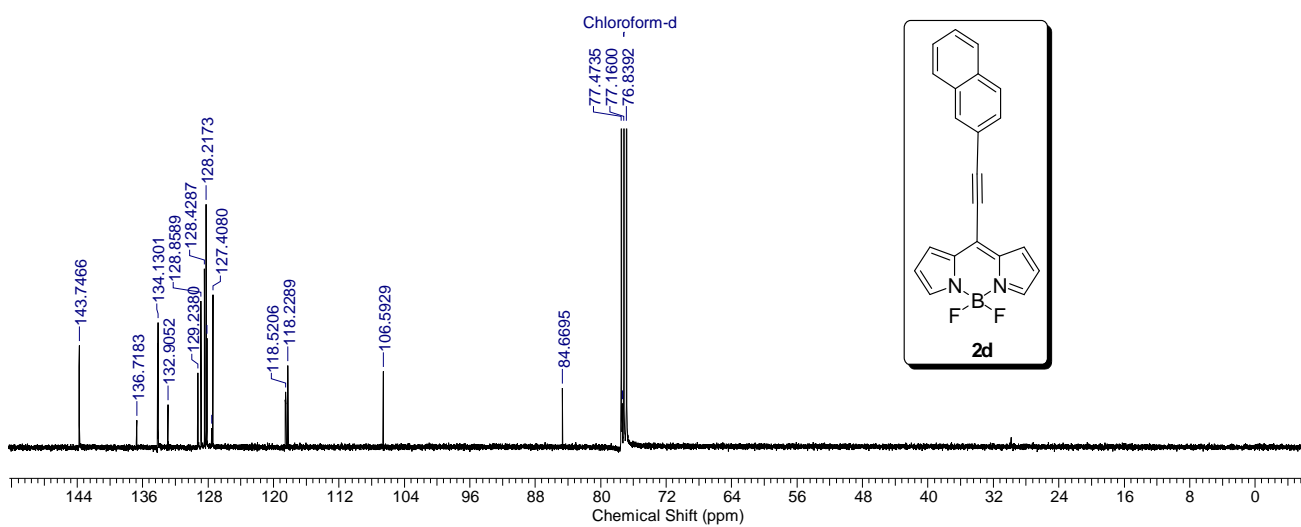

$^{13}\text{C}$  NMR spectra of **2d**



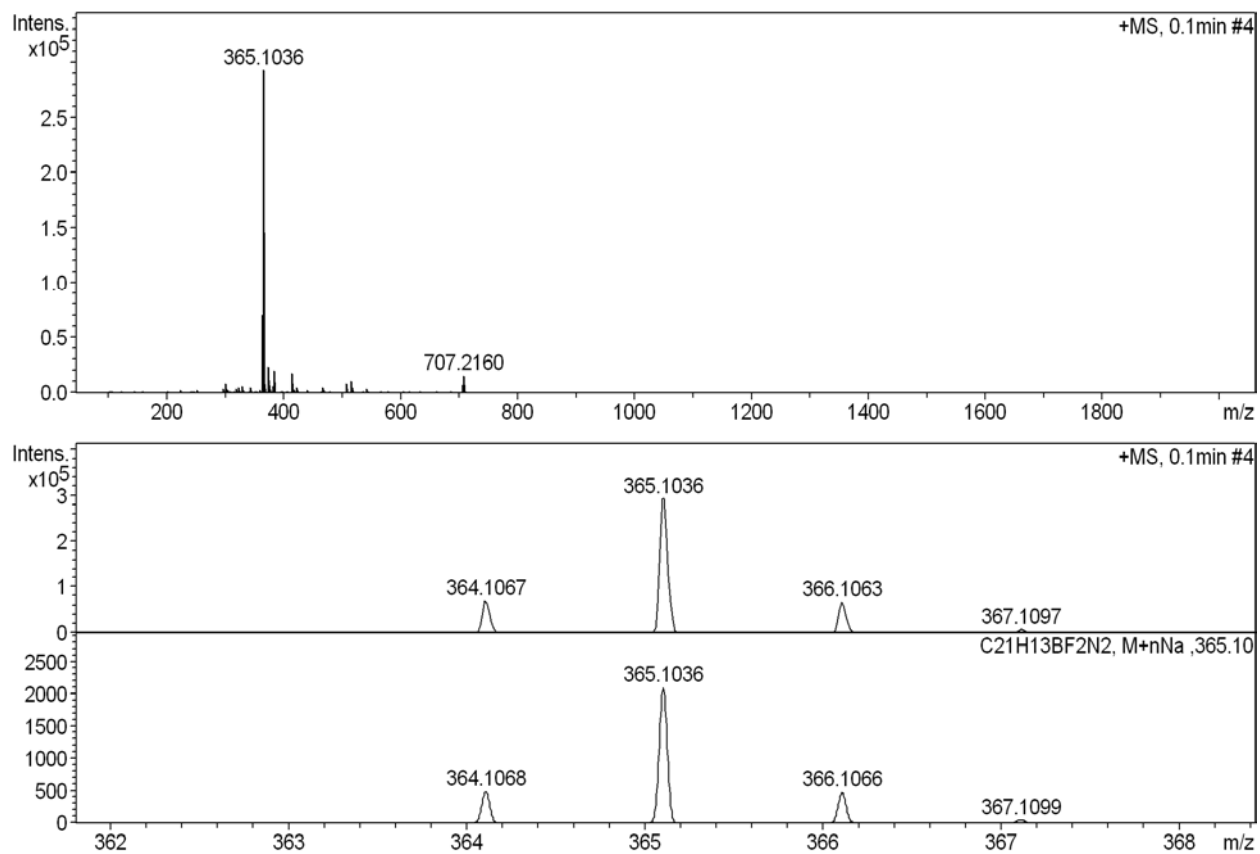

HRMS spectra of 2e

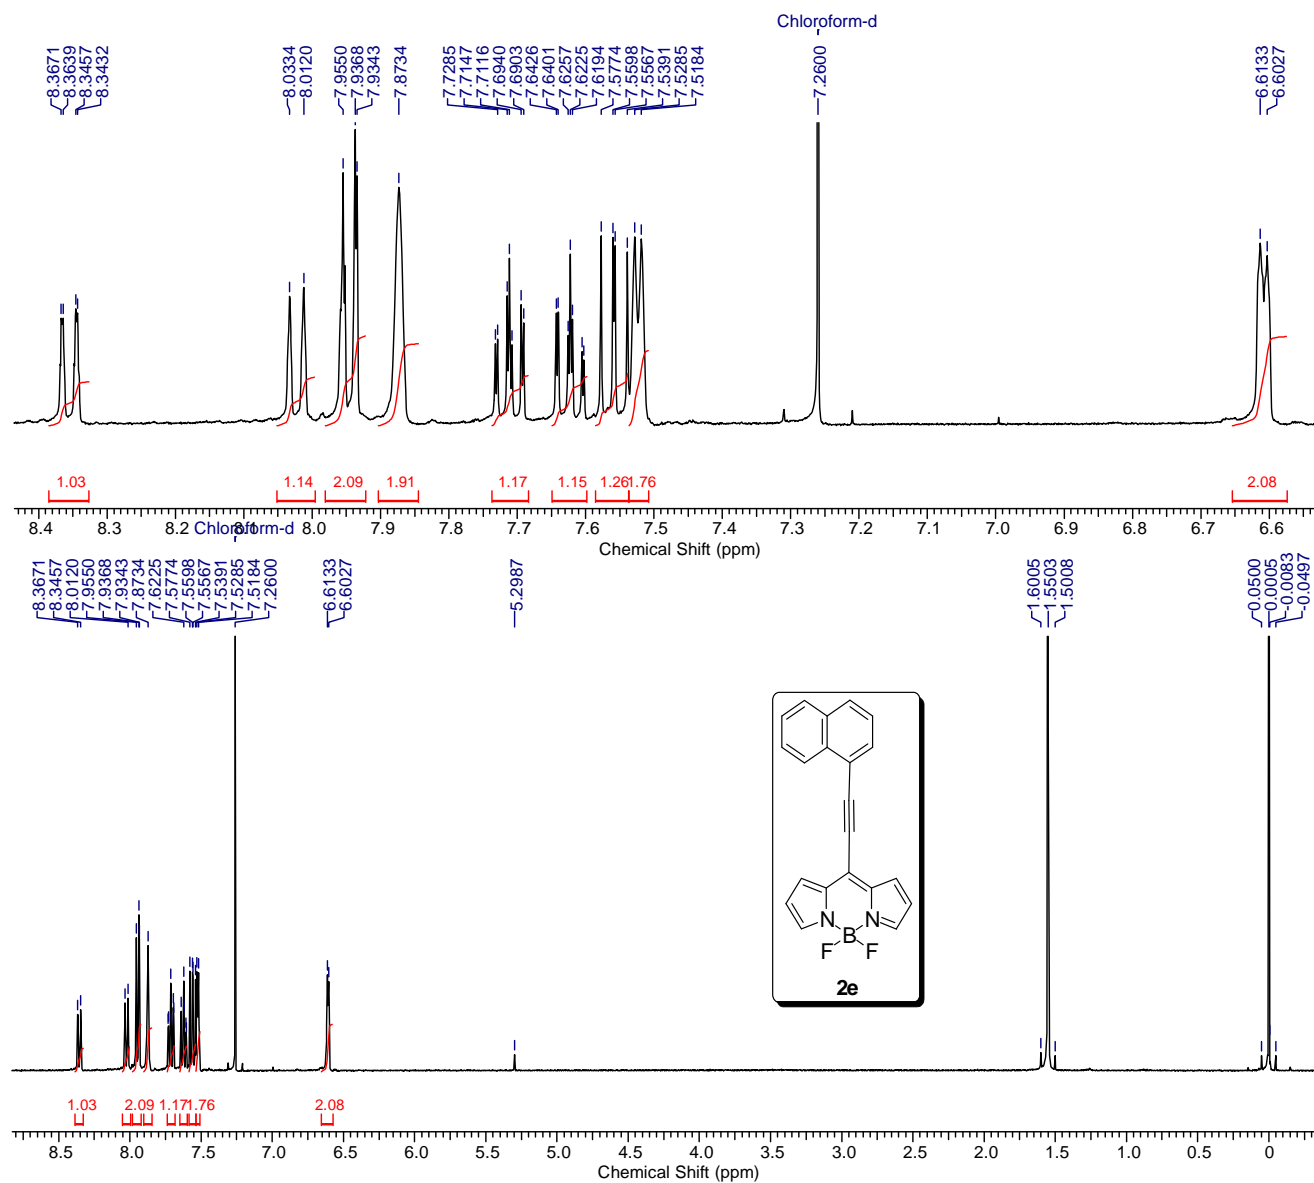

$^1\text{H}$  NMR spectra of **2e**

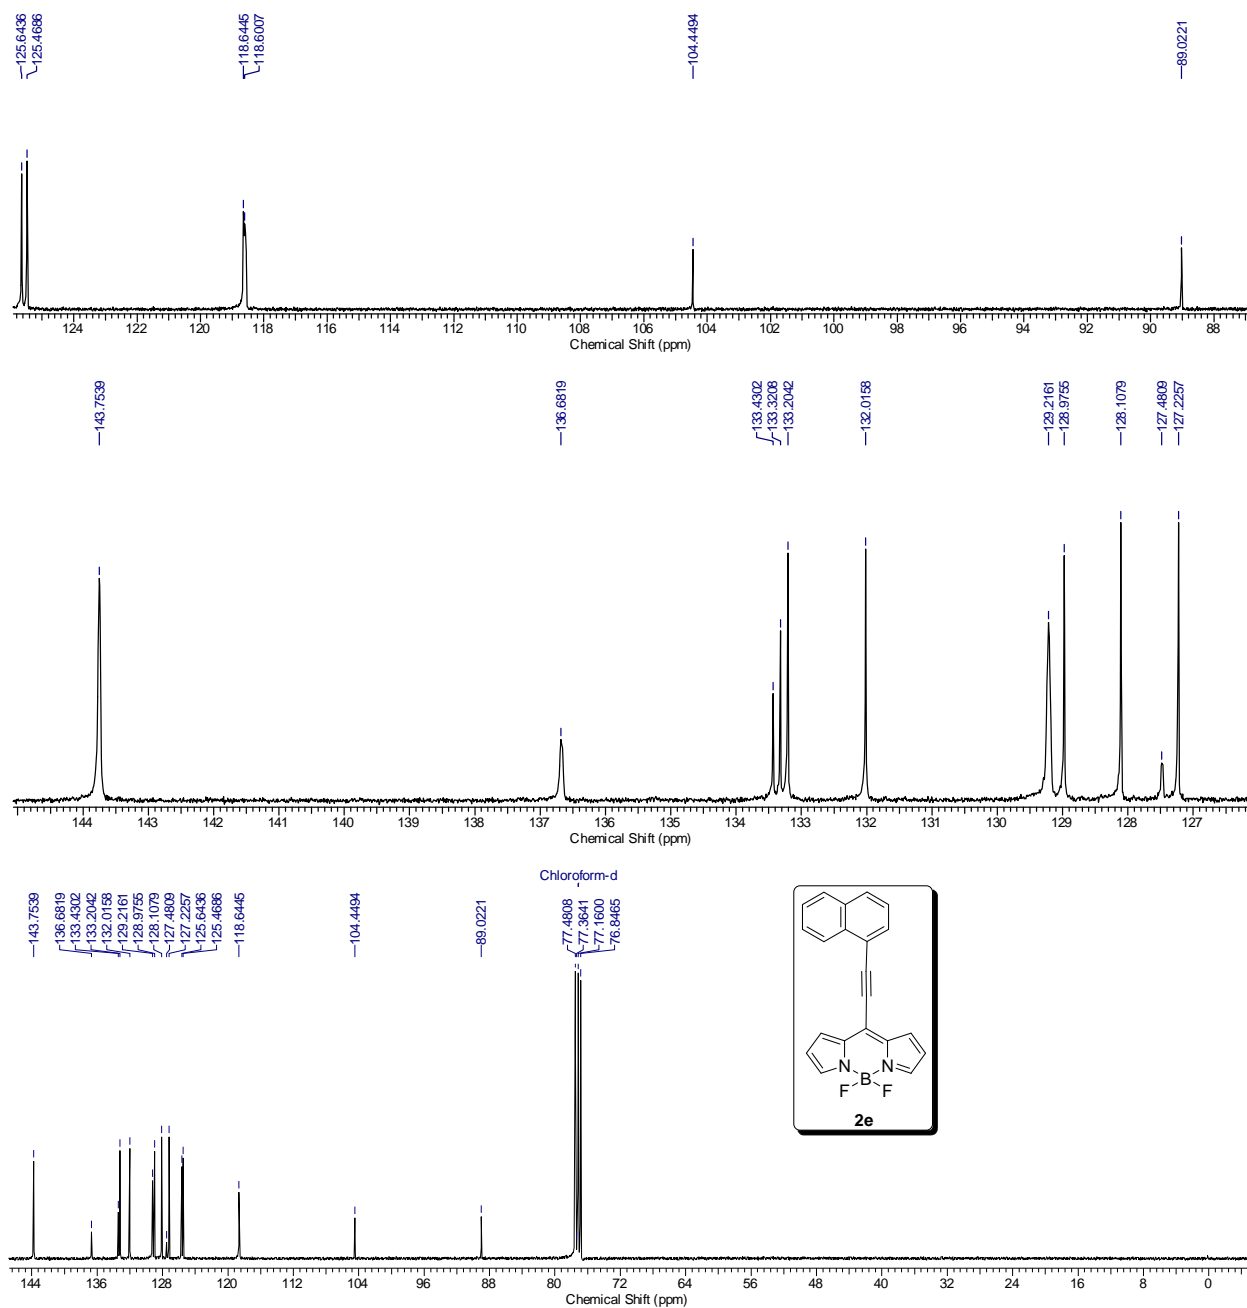

$^{13}\text{C}$  NMR spectra of **2e**

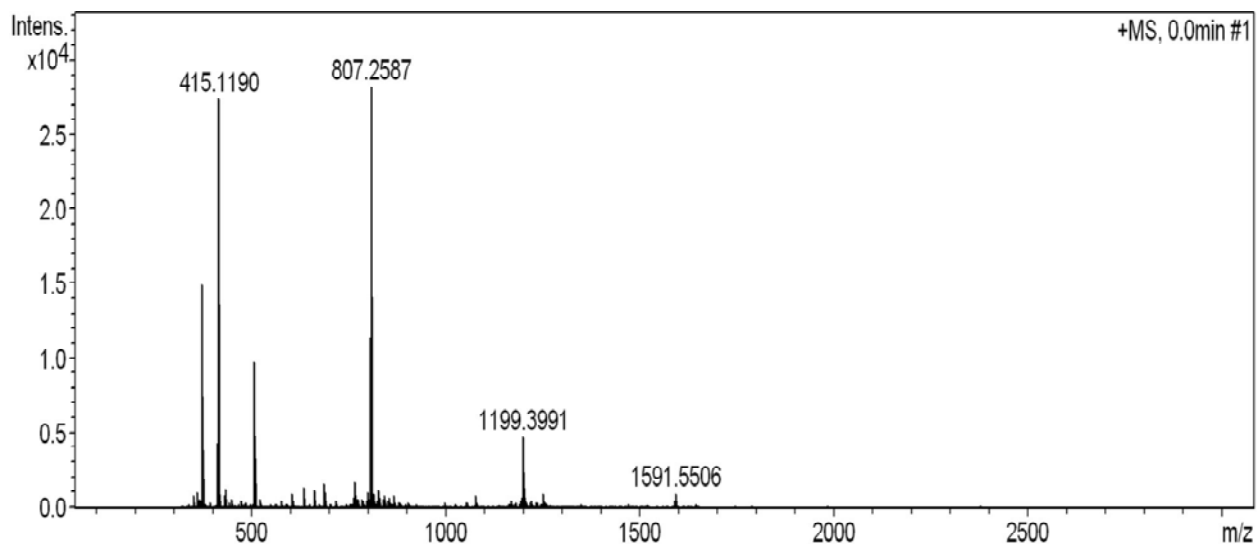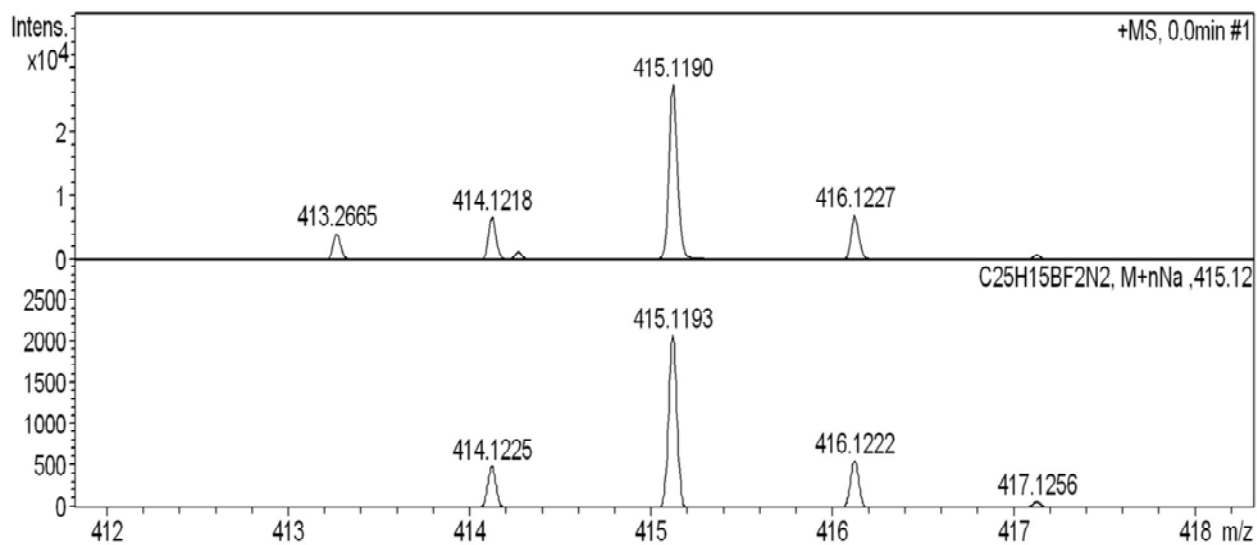

HRMS spectra of **2f**

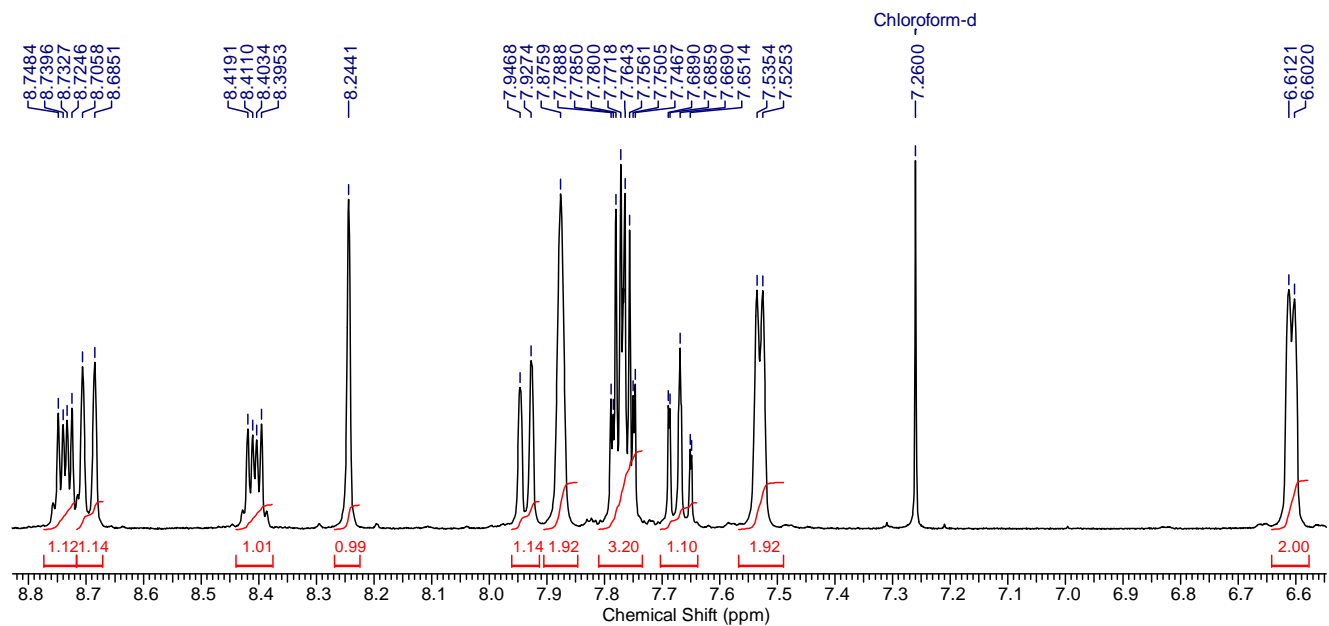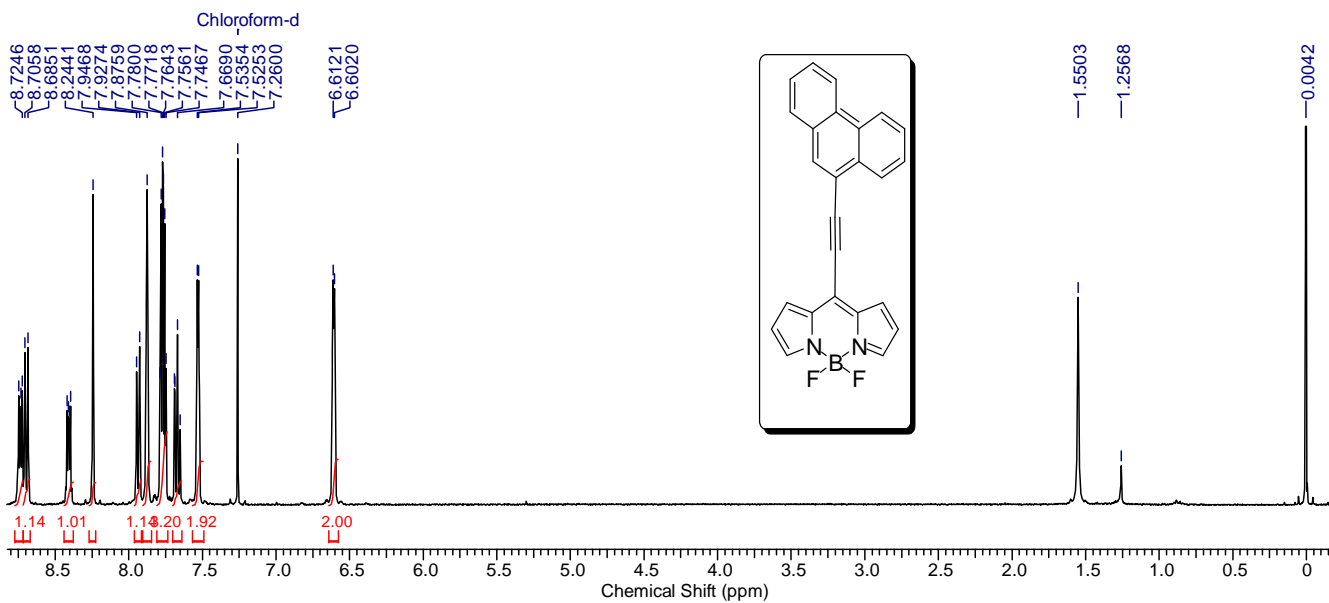

$^1\text{H}$  NMR spectra of **2f**

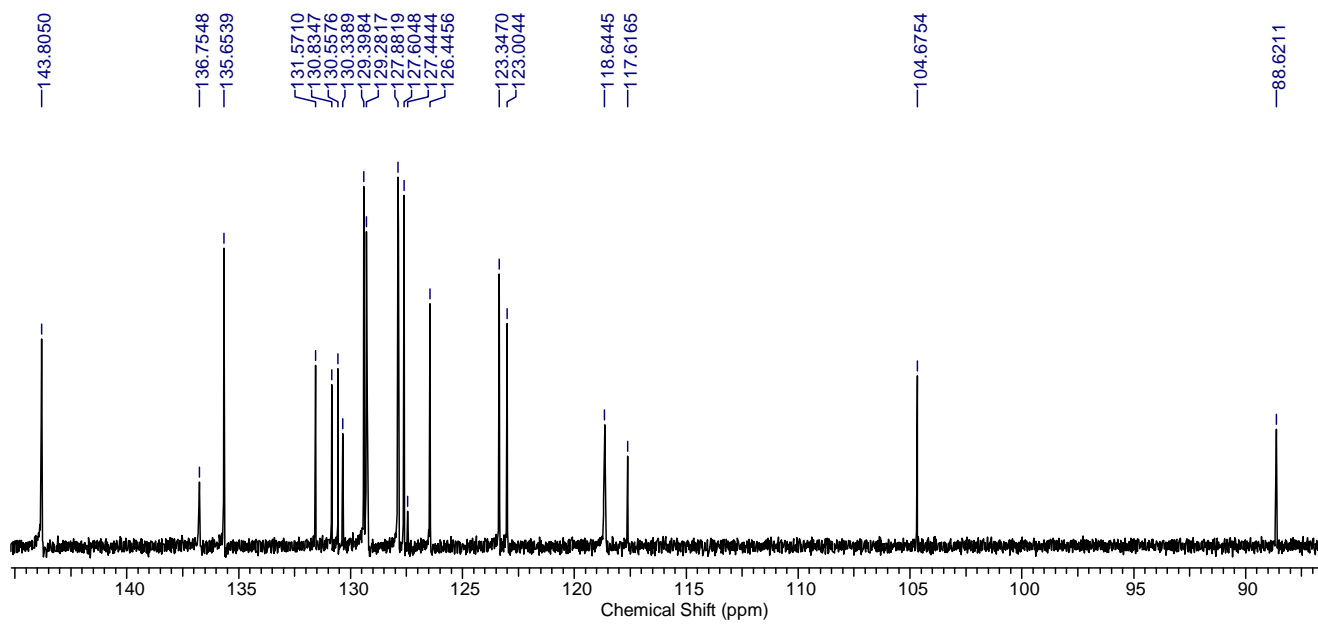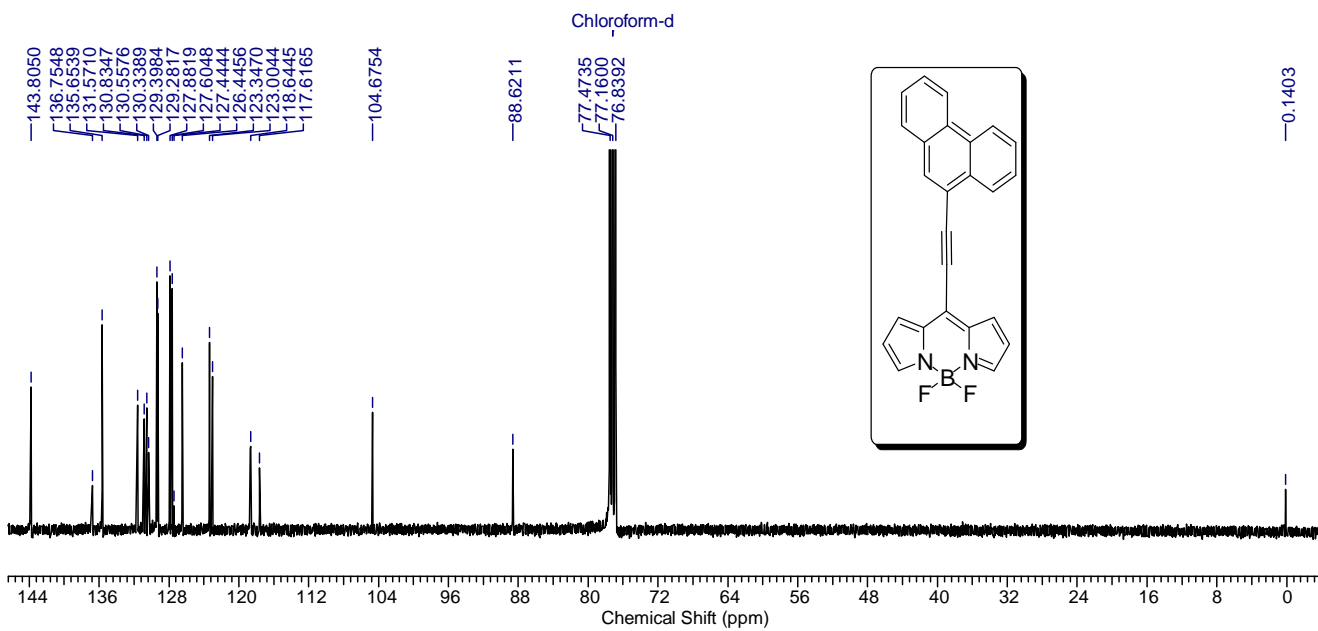

$^{13}\text{C}$  NMR spectra of **2f**

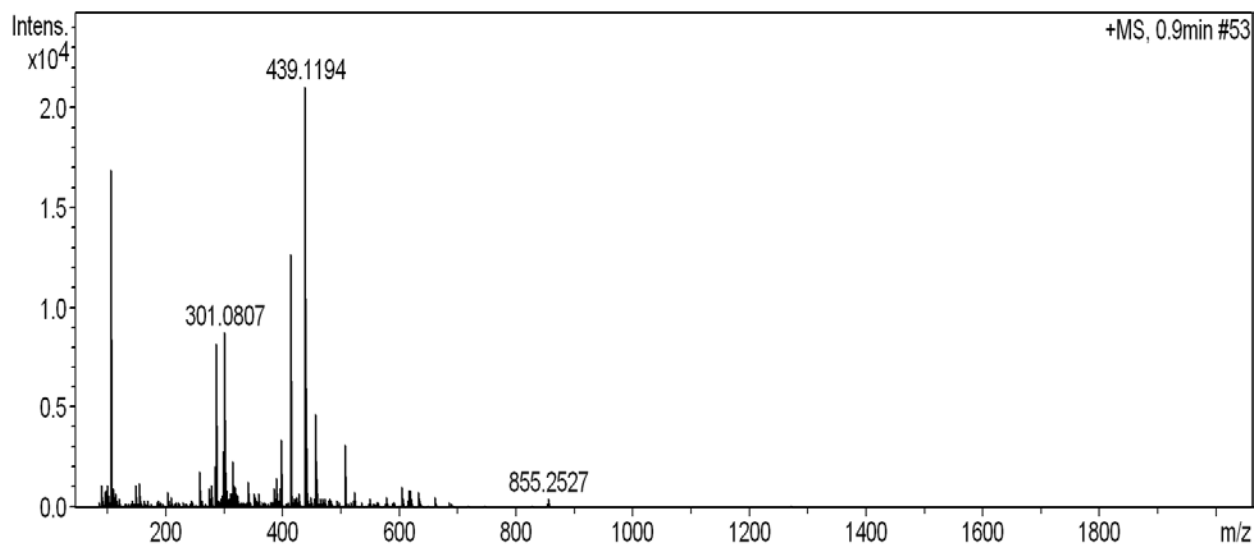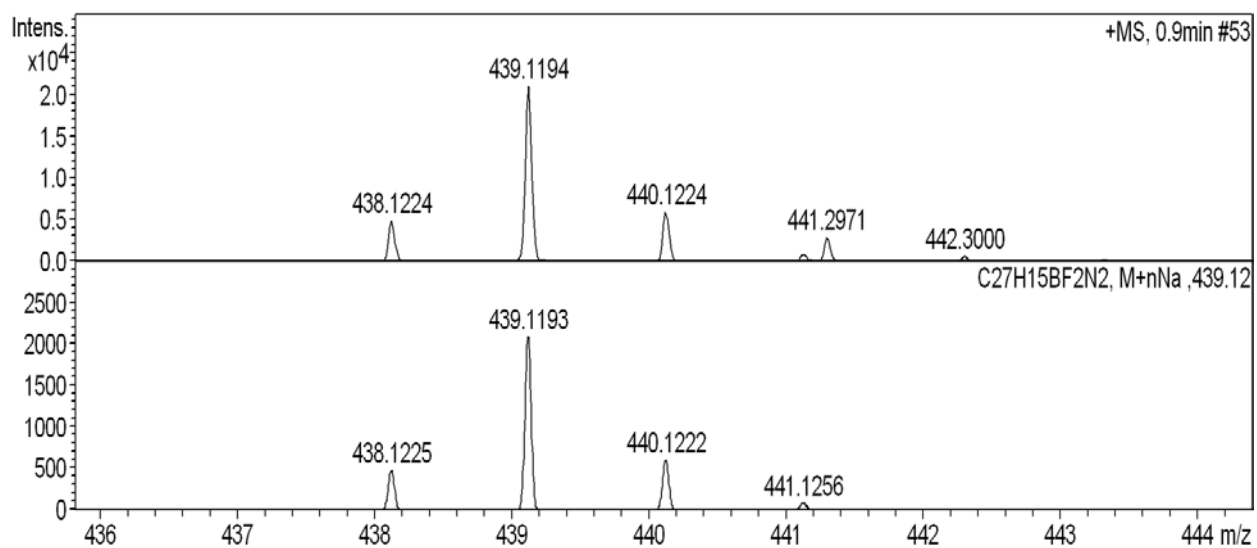

HRMS spectra of **2g**

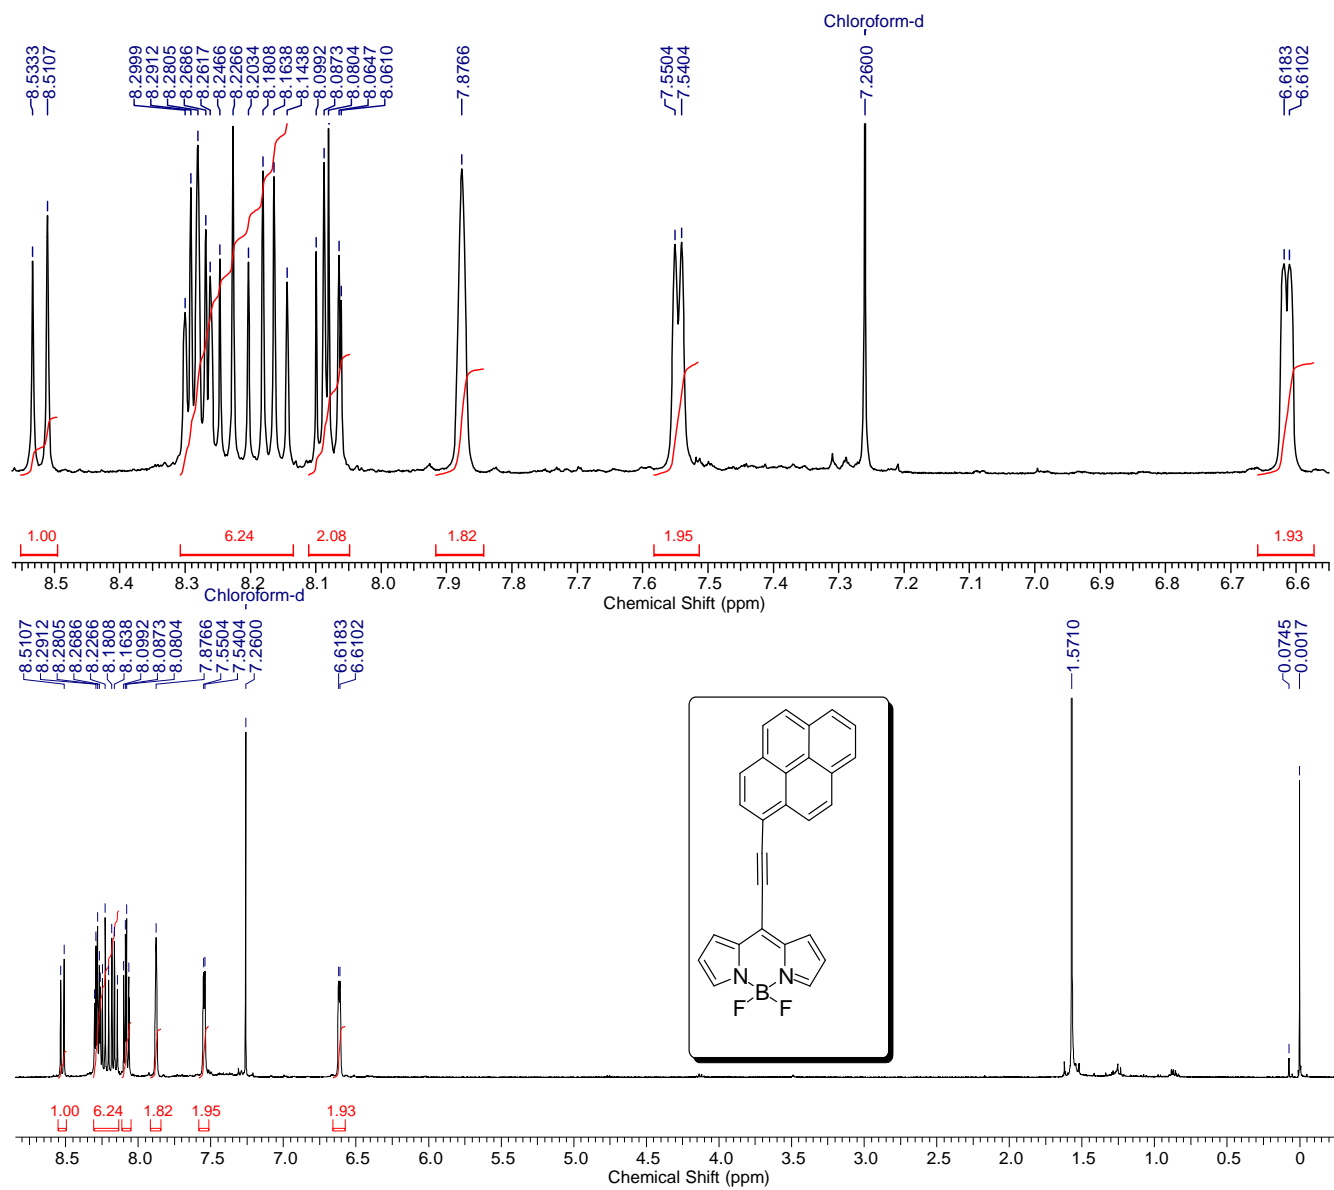

$^1\text{H}$  NMR spectra of **2g**



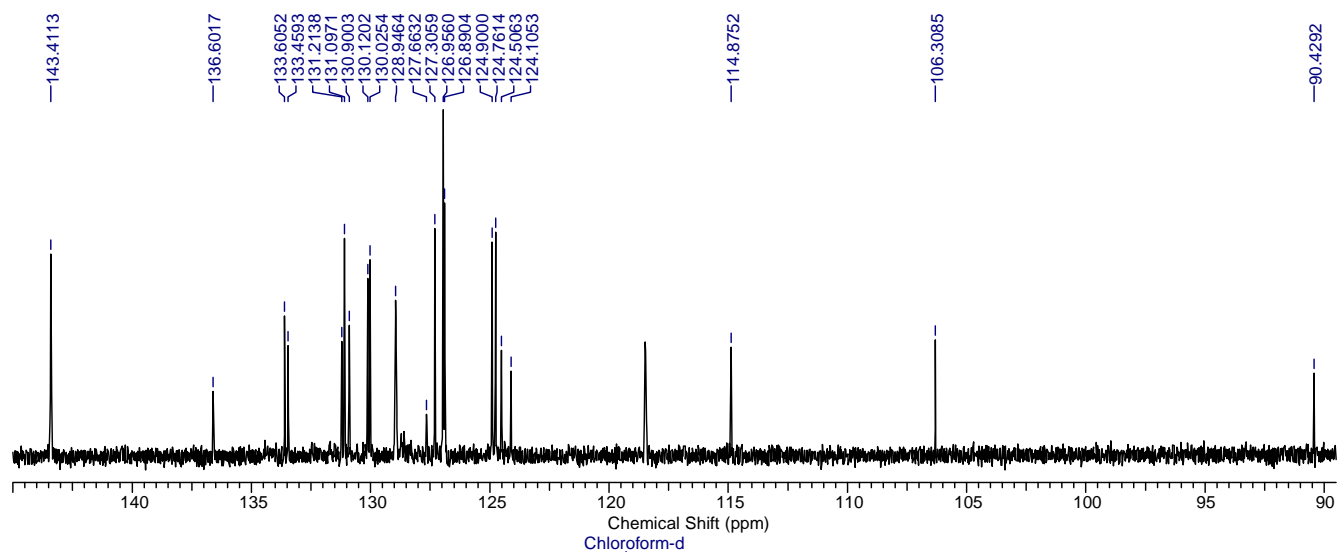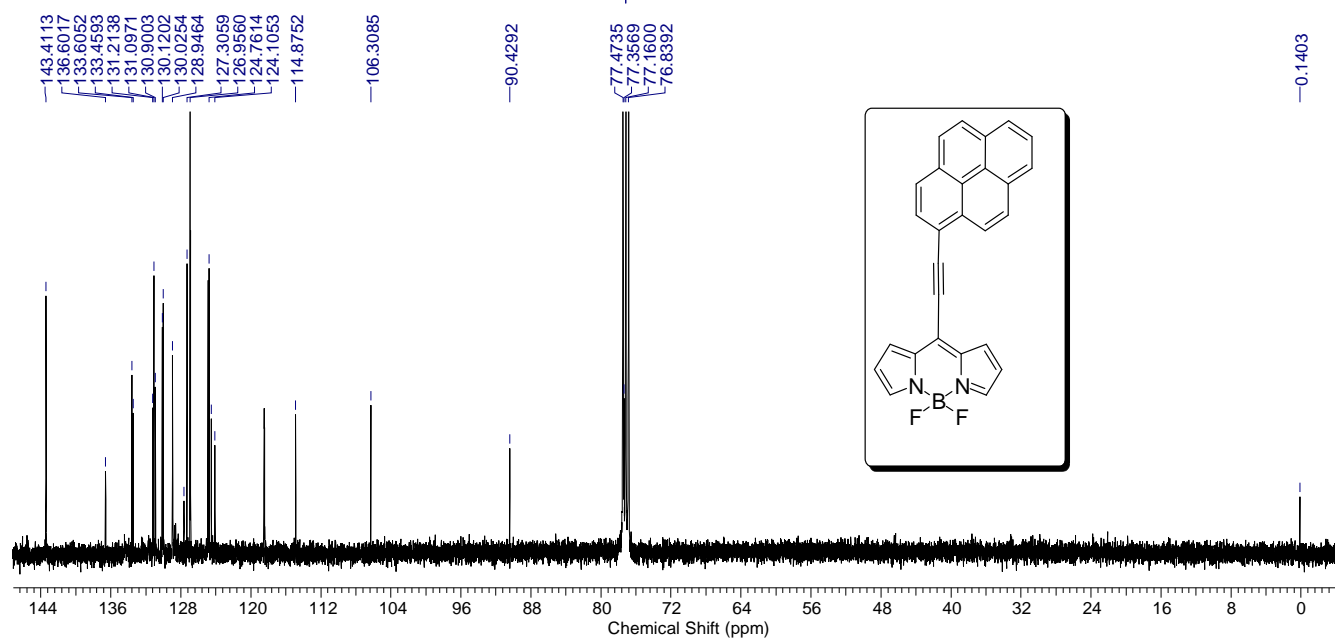

$^{13}\text{C}$  NMR spectra of **2g**

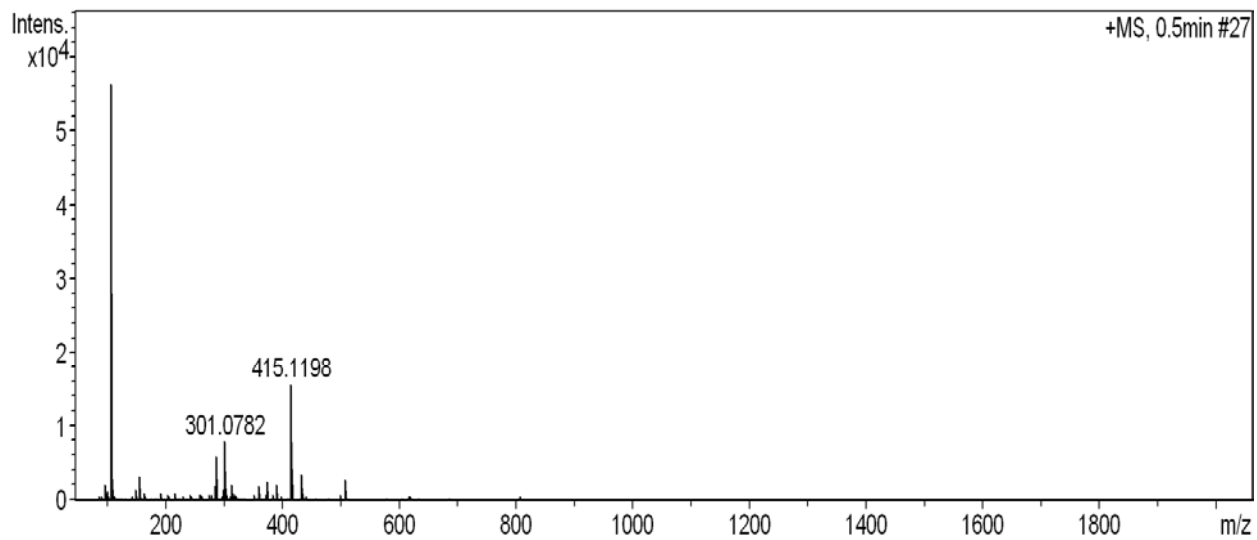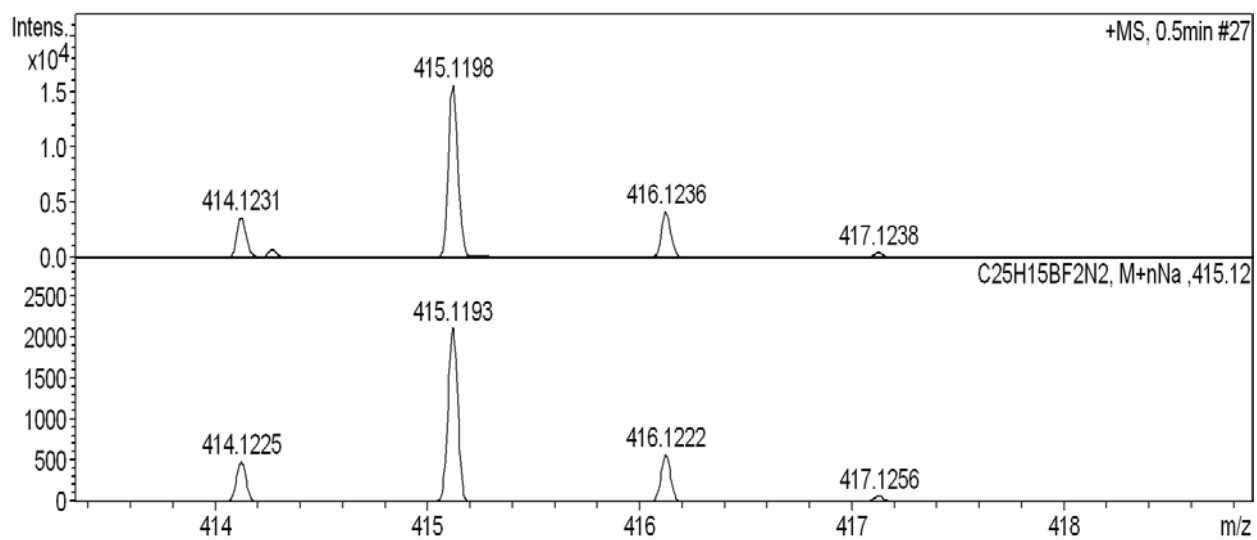

HRMS spectra of **2h**

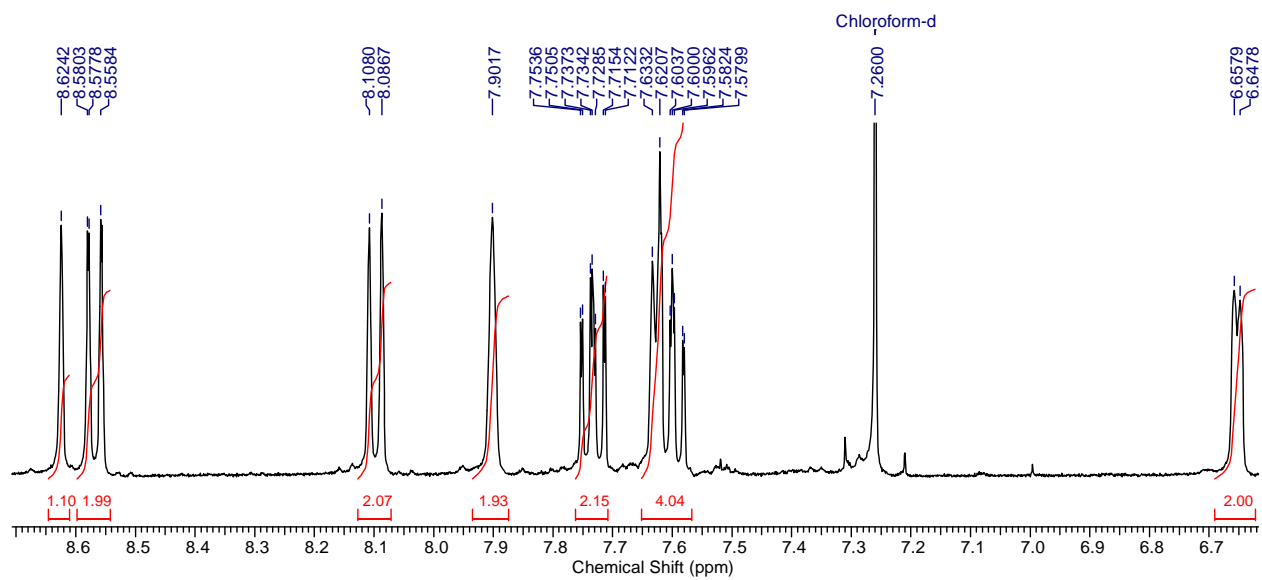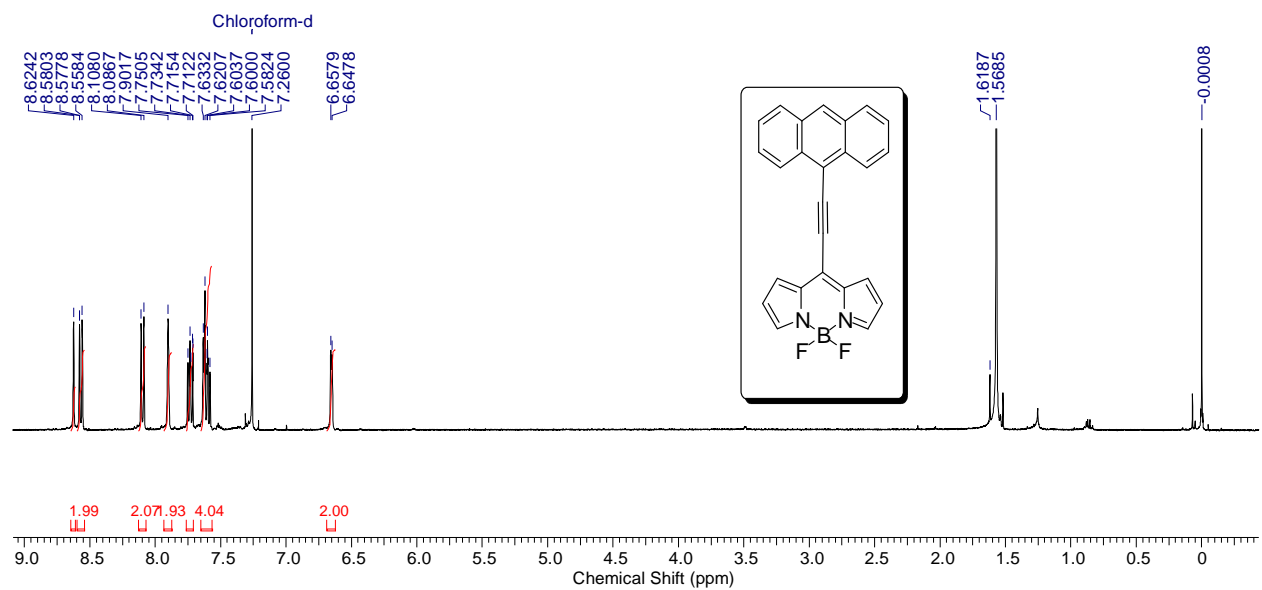

$^1\text{H}$  NMR spectra of **2h**

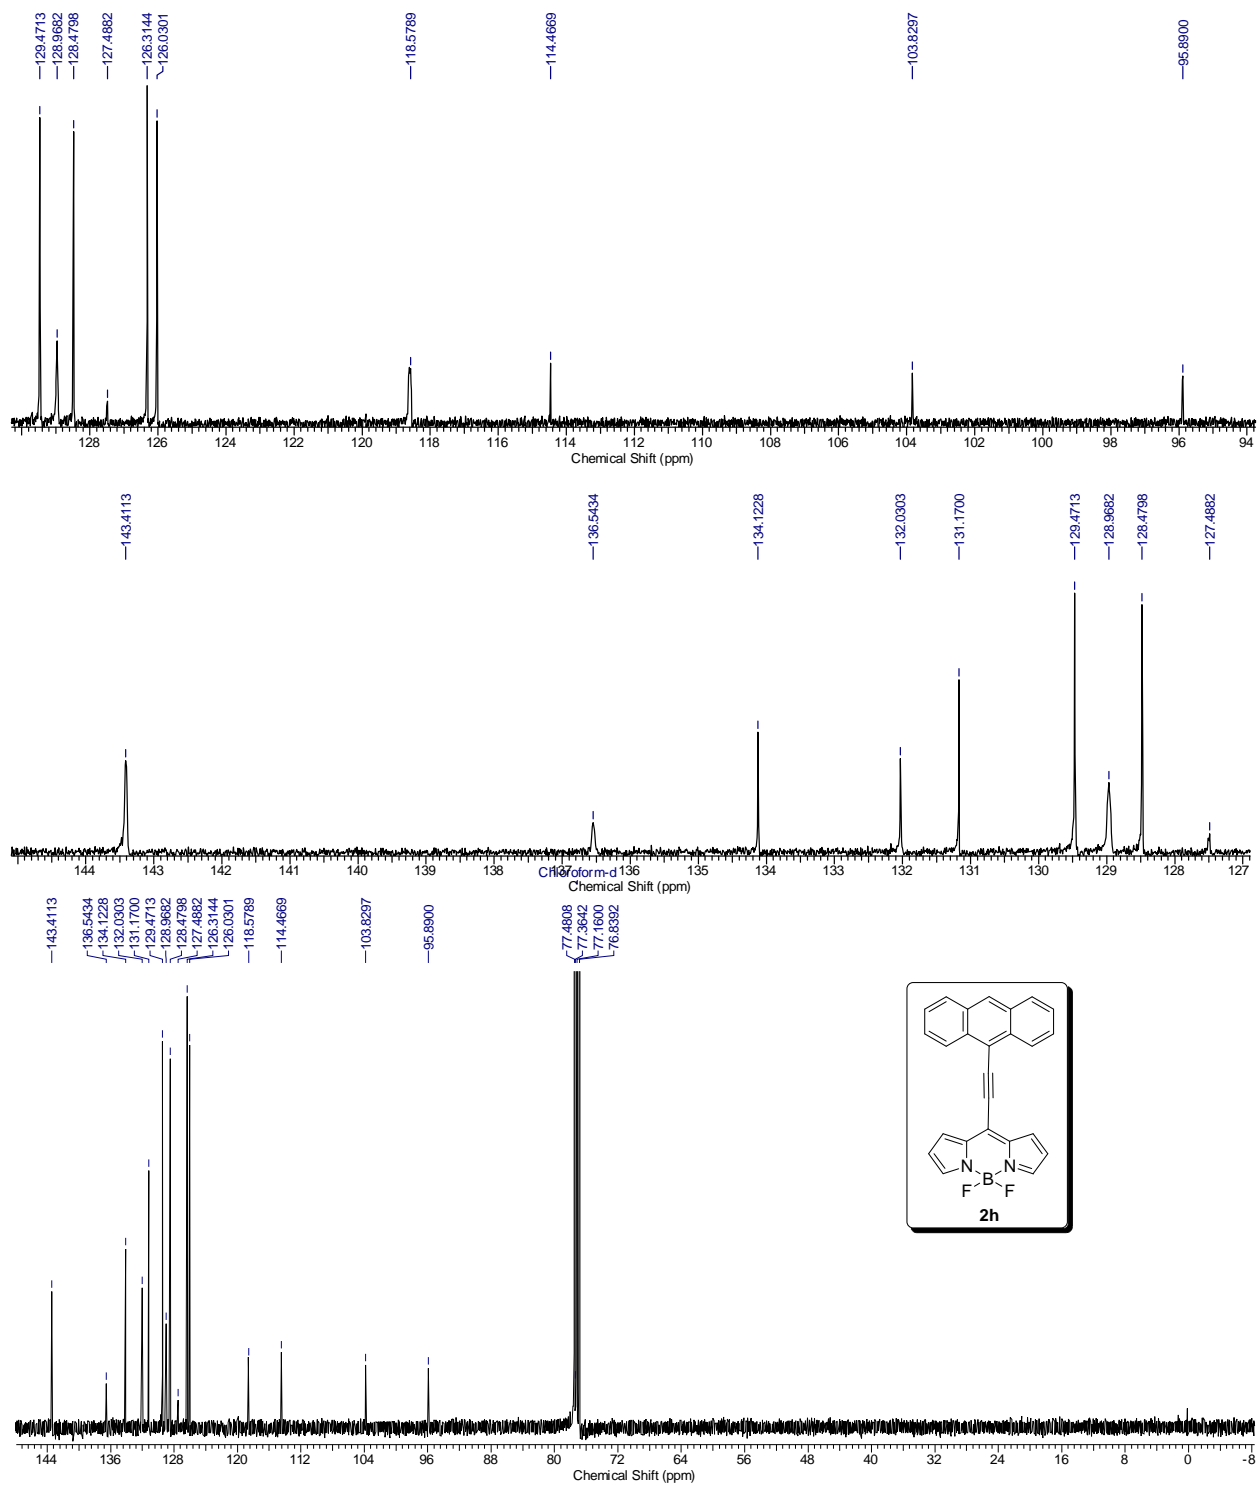

$^{13}\text{C}$  NMR spectra of **2h**

## DFT calculation data

Calculation method: B3LYP/6-31G(d) with Gaussian 09.<sup>2</sup>

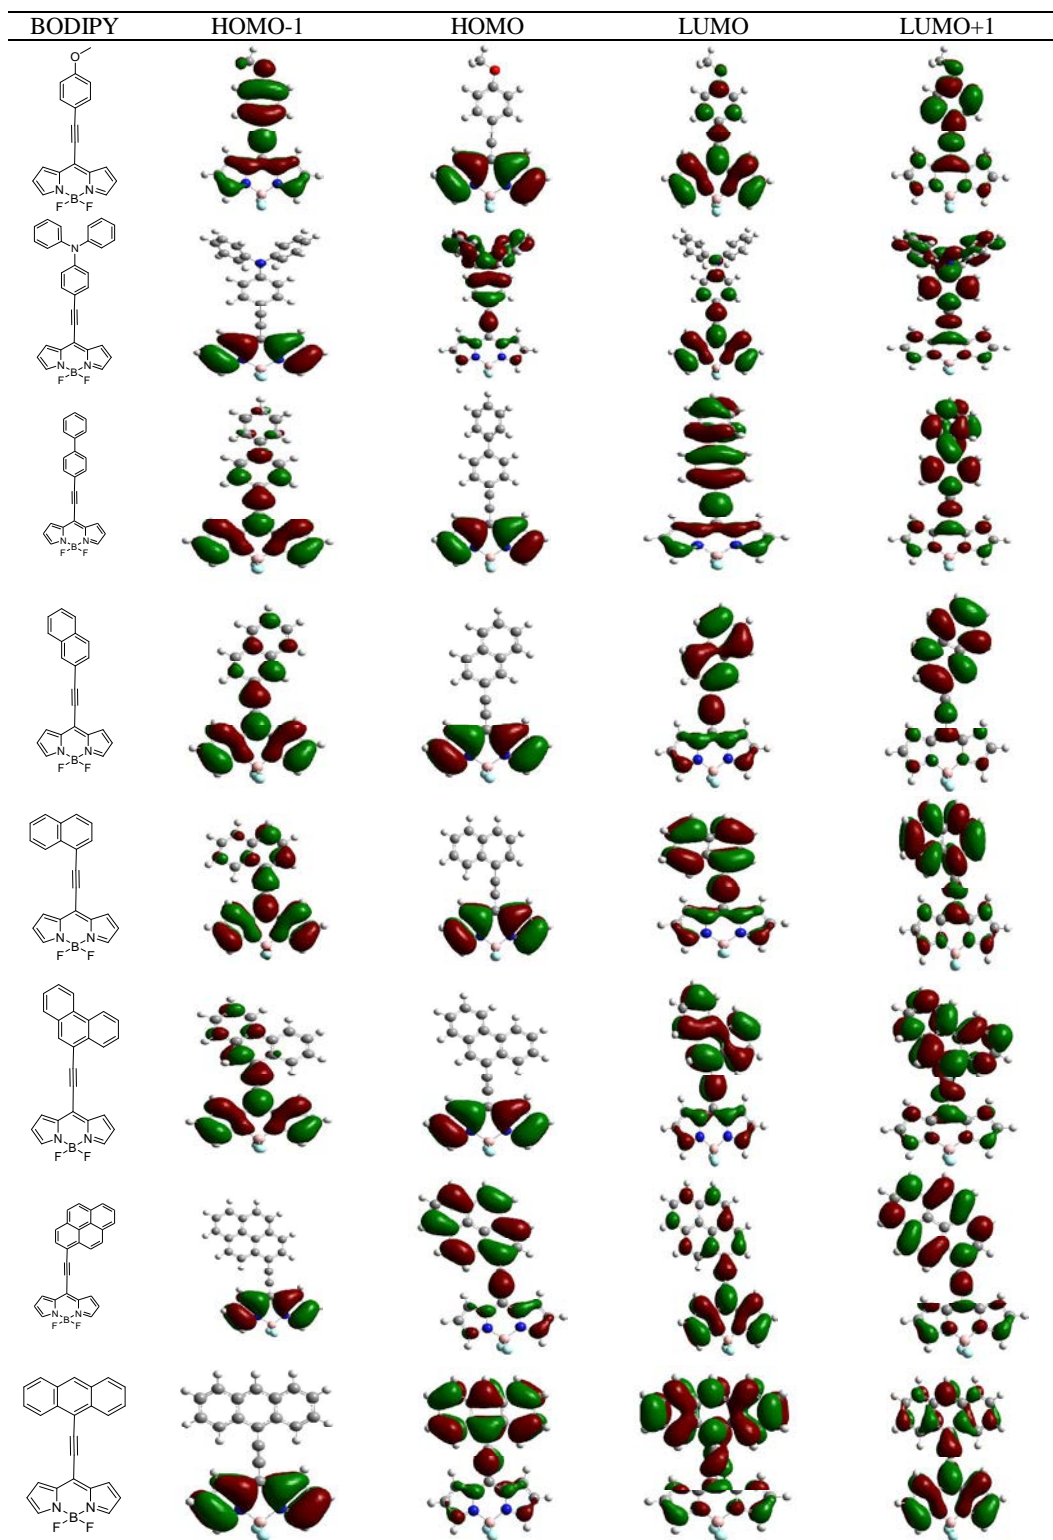

The HOMO-1, HOMO, LUMO, LUMO+1 energy levels of the BODIPY dimmers

DFT Data for meso-arylethynyl BODIPY **2a**

Standard orientation:

| -----  |        |        |                         |           |           |  |
|--------|--------|--------|-------------------------|-----------|-----------|--|
| Center | Atomic | Atomic | Coordinates (Angstroms) |           |           |  |
| Number | Number | Type   | X                       | Y         | Z         |  |
| -----  |        |        |                         |           |           |  |
| 1      | 6      | 0      | 1.423410                | 2.546303  | -0.084649 |  |
| 2      | 1      | 0      | 0.373736                | 2.804655  | -0.104308 |  |
| 3      | 6      | 0      | 2.516227                | 3.405004  | -0.120820 |  |
| 4      | 1      | 0      | 2.504050                | 4.485052  | -0.171706 |  |
| 5      | 6      | 0      | 3.668252                | 2.594270  | -0.085738 |  |
| 6      | 1      | 0      | 4.710645                | 2.883147  | -0.096311 |  |
| 7      | 7      | 0      | 3.323711                | 1.296967  | -0.031347 |  |
| 8      | 5      | 0      | 4.312519                | 0.085600  | 0.101503  |  |
| 9      | 6      | 0      | 2.750879                | -3.350862 | -0.116326 |  |
| 10     | 6      | 0      | 1.601084                | -2.570271 | -0.081152 |  |
| 11     | 1      | 0      | 0.571999                | -2.901411 | -0.100030 |  |
| 12     | 6      | 0      | 2.020657                | -1.219076 | -0.028890 |  |
| 13     | 6      | 0      | 1.274508                | -0.020201 | -0.017372 |  |
| 14     | 6      | 0      | 1.935914                | 1.227758  | -0.030535 |  |
| 15     | 7      | 0      | 3.410059                | -1.191605 | -0.029821 |  |
| 16     | 9      | 0      | 5.243621                | 0.117453  | -0.918490 |  |
| 17     | 6      | 0      | 3.843832                | -2.461859 | -0.082434 |  |
| 18     | 1      | 0      | 4.903804                | -2.677441 | -0.092742 |  |
| 19     | 9      | 0      | 4.918299                | 0.107312  | 1.344634  |  |

|    |   |   |           |           |           |
|----|---|---|-----------|-----------|-----------|
| 20 | 1 | 0 | 2.813741  | -4.429209 | -0.165670 |
| 21 | 6 | 0 | -0.135853 | -0.068359 | -0.014120 |
| 22 | 6 | 0 | -1.354545 | -0.107030 | -0.006997 |
| 23 | 6 | 0 | -2.771236 | -0.152929 | 0.000978  |
| 24 | 6 | 0 | -3.457285 | -1.390005 | 0.006248  |
| 25 | 6 | 0 | -3.531043 | 1.032224  | 0.004184  |
| 26 | 6 | 0 | -4.839272 | -1.432106 | 0.014196  |
| 27 | 1 | 0 | -2.886372 | -2.313112 | 0.004257  |
| 28 | 6 | 0 | -4.921580 | 0.996852  | 0.012176  |
| 29 | 1 | 0 | -3.019153 | 1.989455  | 0.000596  |
| 30 | 6 | 0 | -5.585032 | -0.239525 | 0.017155  |
| 31 | 1 | 0 | -5.374405 | -2.376124 | 0.018367  |
| 32 | 1 | 0 | -5.476542 | 1.927575  | 0.014468  |
| 33 | 8 | 0 | -6.932913 | -0.391383 | 0.024920  |
| 34 | 6 | 0 | -7.751444 | 0.772348  | 0.028916  |
| 35 | 1 | 0 | -7.584530 | 1.381629  | -0.868131 |
| 36 | 1 | 0 | -8.780524 | 0.410509  | 0.035051  |
| 37 | 1 | 0 | -7.574248 | 1.382714  | 0.923243  |

-----  
Total Energy= -1103.1147262 HF

DFT data for *meso*-arylethynyl BODIPY **2b**

Standard orientation:

-----  
Center    Atomic    Atomic    Coordinates (Angstroms)  
Number    Number    Type        X        Y        Z  
-----

|    |   |   |           |           |           |
|----|---|---|-----------|-----------|-----------|
| 1  | 6 | 0 | -4.118253 | -2.376357 | -0.950875 |
| 2  | 1 | 0 | -3.078004 | -2.645663 | -1.070740 |
| 3  | 6 | 0 | -5.240062 | -3.136649 | -1.263282 |
| 4  | 1 | 0 | -5.264518 | -4.134683 | -1.678775 |
| 5  | 6 | 0 | -6.363444 | -2.350585 | -0.939891 |
| 6  | 1 | 0 | -7.415145 | -2.585039 | -1.034957 |
| 7  | 7 | 0 | -5.974510 | -1.160598 | -0.451491 |
| 8  | 5 | 0 | -6.921601 | -0.035552 | 0.094921  |
| 9  | 6 | 0 | -5.246198 | 3.215547  | 1.049914  |
| 10 | 6 | 0 | -4.122862 | 2.434624  | 0.800206  |
| 11 | 1 | 0 | -3.083129 | 2.719339  | 0.883294  |
| 12 | 6 | 0 | -4.587436 | 1.161817  | 0.391442  |
| 13 | 6 | 0 | -3.880922 | 0.007703  | -0.015967 |
| 14 | 6 | 0 | -4.585321 | -1.139991 | -0.444755 |
| 15 | 7 | 0 | -5.976672 | 1.179400  | 0.399002  |
| 16 | 9 | 0 | -7.850947 | 0.312917  | -0.866571 |
| 17 | 6 | 0 | -6.368003 | 2.403720  | 0.791072  |
| 18 | 1 | 0 | -7.420200 | 2.642147  | 0.869090  |
| 19 | 9 | 0 | -7.532586 | -0.459809 | 1.261411  |
| 20 | 1 | 0 | -5.272629 | 4.246696  | 1.374483  |
| 21 | 6 | 0 | -2.471439 | 0.008149  | -0.014343 |
| 22 | 6 | 0 | -1.251157 | 0.006686  | -0.010149 |
| 23 | 6 | 0 | 0.163593  | 0.004515  | -0.005799 |
| 24 | 6 | 0 | 0.890896  | -1.147836 | -0.376616 |
| 25 | 6 | 0 | 0.892432  | 1.154450  | 0.369382  |
| 26 | 6 | 0 | 2.275435  | -1.150976 | -0.375857 |



|    |   |   |          |           |           |
|----|---|---|----------|-----------|-----------|
| 27 | 1 | 0 | 0.351350 | -2.039791 | -0.679808 |
| 28 | 6 | 0 | 2.276976 | 1.153192  | 0.376232  |
| 29 | 1 | 0 | 0.354088 | 2.047906  | 0.670284  |
| 30 | 6 | 0 | 2.999660 | 0.000047  | 0.001978  |
| 31 | 1 | 0 | 2.810999 | -2.043979 | -0.678089 |
| 32 | 1 | 0 | 2.813689 | 2.044402  | 0.681717  |
| 33 | 7 | 0 | 4.403421 | -0.001982 | 0.005358  |
| 34 | 6 | 0 | 5.136019 | 1.195848  | -0.256831 |
| 35 | 6 | 0 | 6.206533 | 1.562027  | 0.571472  |
| 36 | 6 | 0 | 4.807291 | 2.005004  | -1.354639 |
| 37 | 6 | 0 | 6.936216 | 2.718555  | 0.300998  |
| 38 | 1 | 0 | 6.461522 | 0.936649  | 1.421294  |
| 39 | 6 | 0 | 5.531496 | 3.168807  | -1.607483 |
| 40 | 1 | 0 | 3.987338 | 1.716730  | -2.005201 |
| 41 | 6 | 0 | 6.600751 | 3.529928  | -0.784873 |
| 42 | 1 | 0 | 7.763526 | 2.991215  | 0.950604  |
| 43 | 1 | 0 | 5.266787 | 3.786830  | -2.461167 |
| 44 | 1 | 0 | 7.167835 | 4.433528  | -0.989067 |
| 45 | 6 | 0 | 5.131265 | -1.202123 | 0.270352  |
| 46 | 6 | 0 | 6.203893 | -1.571531 | -0.553760 |
| 47 | 6 | 0 | 4.795554 | -2.010392 | 1.366688  |
| 48 | 6 | 0 | 6.928844 | -2.730419 | -0.280618 |
| 49 | 1 | 0 | 6.464297 | -0.946840 | -1.402443 |
| 50 | 6 | 0 | 5.515079 | -3.176522 | 1.622170  |
| 51 | 1 | 0 | 3.973900 | -1.719649 | 2.014010  |
| 52 | 6 | 0 | 6.586457 | -3.540891 | 0.803747  |

|    |   |   |          |           |           |
|----|---|---|----------|-----------|-----------|
| 53 | 1 | 0 | 7.757867 | -3.005585 | -0.926976 |
| 54 | 1 | 0 | 5.245004 | -3.793890 | 2.474641  |
| 55 | 1 | 0 | 7.149785 | -4.446356 | 1.010070  |

-----  
Total Energy = -1506.0416803 HF

DFT data for *meso*-arylethynyl BODIPY **2c**

Standard orientation:

-----

| Center | Atomic | Atomic | Coordinates (Angstroms) |           |           |
|--------|--------|--------|-------------------------|-----------|-----------|
| Number | Number | Type   | X                       | Y         | Z         |
| 1      | 6      | 0      | -2.699110               | -2.549335 | -0.248511 |
| 2      | 1      | 0      | -1.659089               | -2.842054 | -0.288743 |
| 3      | 6      | 0      | -3.820621               | -3.365202 | -0.336889 |
| 4      | 1      | 0      | -3.846034               | -4.439374 | -0.457964 |
| 5      | 6      | 0      | -4.944349               | -2.518784 | -0.245727 |
| 6      | 1      | 0      | -5.996073               | -2.770503 | -0.272128 |
| 7      | 7      | 0      | -4.555533               | -1.240697 | -0.108267 |
| 8      | 5      | 0      | -5.501829               | -0.006614 | 0.106262  |
| 9      | 6      | 0      | -3.819996               | 3.380703  | 0.101241  |
| 10     | 6      | 0      | -2.698653               | 2.560070  | 0.081984  |
| 11     | 1      | 0      | -1.658584               | 2.855371  | 0.081383  |
| 12     | 6      | 0      | -3.165734               | 1.223314  | 0.048809  |
| 13     | 6      | 0      | -2.463135               | 0.001111  | -0.018031 |
| 14     | 6      | 0      | -3.165924               | -1.219565 | -0.107331 |

|    |   |   |           |           |           |
|----|---|---|-----------|-----------|-----------|
| 15 | 7 | 0 | -4.555344 | 1.244679  | 0.051194  |
| 16 | 9 | 0 | -6.436023 | 0.058199  | -0.908739 |
| 17 | 6 | 0 | -4.943888 | 2.529835  | 0.081971  |
| 18 | 1 | 0 | -5.995551 | 2.783074  | 0.089656  |
| 19 | 9 | 0 | -6.102987 | -0.085784 | 1.348870  |
| 20 | 1 | 0 | -3.845210 | 4.461487  | 0.121576  |
| 21 | 6 | 0 | -1.050207 | 0.001009  | -0.017200 |
| 22 | 6 | 0 | 0.168387  | 0.000699  | -0.012385 |
| 23 | 6 | 0 | 1.587791  | 0.000304  | -0.006867 |
| 24 | 6 | 0 | 2.309054  | 1.211840  | 0.014933  |
| 25 | 6 | 0 | 2.308494  | -1.211660 | -0.022752 |
| 26 | 6 | 0 | 3.696903  | 1.205410  | 0.020180  |
| 27 | 1 | 0 | 1.767121  | 2.152146  | 0.037353  |
| 28 | 6 | 0 | 3.696343  | -1.206027 | -0.016753 |
| 29 | 1 | 0 | 1.766197  | -2.151663 | -0.048877 |
| 30 | 6 | 0 | 4.422475  | -0.000521 | 0.004643  |
| 31 | 1 | 0 | 4.231582  | 2.149466  | 0.064584  |
| 32 | 1 | 0 | 4.230807  | -2.150409 | -0.056539 |
| 33 | 6 | 0 | 5.905180  | -0.000938 | 0.010894  |
| 34 | 6 | 0 | 6.629831  | 0.973535  | -0.697137 |
| 35 | 6 | 0 | 6.623199  | -0.975780 | 0.725156  |
| 36 | 6 | 0 | 8.023444  | 0.972325  | -0.692015 |
| 37 | 1 | 0 | 6.096434  | 1.719415  | -1.279630 |
| 38 | 6 | 0 | 8.016800  | -0.975238 | 0.732121  |
| 39 | 1 | 0 | 6.084419  | -1.721342 | 1.303077  |
| 40 | 6 | 0 | 8.722948  | -0.001626 | 0.023104  |

|    |   |   |          |           |           |
|----|---|---|----------|-----------|-----------|
| 41 | 1 | 0 | 8.563740 | 1.729022  | -1.254463 |
| 42 | 1 | 0 | 8.551827 | -1.732152 | 1.299289  |
| 43 | 1 | 0 | 9.809417 | -0.001868 | 0.027836  |

---

Total Energy= -1219.6478668 HF

DFT data for *meso*-arylethynyl BODIPY **2d**

Standard orientation:

---

| Center | Atomic | Atomic | Coordinates (Angstroms) |           |           |
|--------|--------|--------|-------------------------|-----------|-----------|
| Number | Number | Type   | X                       | Y         | Z         |
| 1      | 6      | 0      | -2.121916               | -2.597946 | -0.070808 |
| 2      | 1      | 0      | -1.114658               | -2.990482 | -0.087768 |
| 3      | 6      | 0      | -3.316376               | -3.307509 | -0.099042 |
| 4      | 1      | 0      | -3.444654               | -4.380343 | -0.140477 |
| 5      | 6      | 0      | -4.353985               | -2.353524 | -0.069308 |
| 6      | 1      | 0      | -5.424987               | -2.505457 | -0.076169 |
| 7      | 7      | 0      | -3.844708               | -1.111611 | -0.025749 |
| 8      | 5      | 0      | -4.669868               | 0.219273  | 0.088762  |

|    |   |   |           |           |           |
|----|---|---|-----------|-----------|-----------|
| 9  | 6 | 0 | -2.669109 | 3.423010  | -0.104128 |
| 10 | 6 | 0 | -1.631858 | 2.498690  | -0.074556 |
| 11 | 1 | 0 | -0.568224 | 2.691694  | -0.092083 |
| 12 | 6 | 0 | -2.225311 | 1.213453  | -0.028205 |
| 13 | 6 | 0 | -1.643000 | -0.072080 | -0.017509 |
| 14 | 6 | 0 | -2.459384 | -1.223036 | -0.026381 |
| 15 | 7 | 0 | -3.606380 | 1.368270  | -0.027624 |
| 16 | 9 | 0 | -5.578109 | 0.305976  | -0.948045 |
| 17 | 6 | 0 | -3.869530 | 2.684462  | -0.073294 |
| 18 | 1 | 0 | -4.891915 | 3.037801  | -0.080705 |
| 19 | 9 | 0 | -5.294728 | 0.280060  | 1.320528  |
| 20 | 1 | 0 | -2.590485 | 4.500557  | -0.147249 |
| 21 | 6 | 0 | -0.236316 | -0.206555 | -0.015463 |
| 22 | 6 | 0 | 0.977354  | -0.314805 | -0.009397 |
| 23 | 6 | 0 | 2.390697  | -0.453565 | -0.001825 |
| 24 | 6 | 0 | 3.211833  | 0.669281  | -0.002123 |
| 25 | 6 | 0 | 2.983436  | -1.755729 | 0.006904  |
| 26 | 6 | 0 | 4.621059  | 0.546401  | 0.006080  |

|    |   |   |          |           |           |
|----|---|---|----------|-----------|-----------|
| 27 | 1 | 0 | 2.765513 | 1.659596  | -0.008411 |
| 28 | 6 | 0 | 4.347250 | -1.897188 | 0.015006  |
| 29 | 1 | 0 | 2.335191 | -2.626071 | 0.007424  |
| 30 | 6 | 0 | 5.475628 | 1.683309  | 0.006058  |
| 31 | 6 | 0 | 5.206454 | -0.762973 | 0.014904  |
| 32 | 1 | 0 | 4.791402 | -2.889412 | 0.021822  |
| 33 | 6 | 0 | 6.843390 | 1.533554  | 0.014427  |
| 34 | 1 | 0 | 5.028476 | 2.674255  | -0.000555 |
| 35 | 6 | 0 | 6.619944 | -0.881601 | 0.023376  |
| 36 | 6 | 0 | 7.420616 | 0.239606  | 0.023171  |
| 37 | 1 | 0 | 7.487225 | 2.408533  | 0.014421  |
| 38 | 1 | 0 | 7.062336 | -1.874718 | 0.030126  |
| 39 | 1 | 0 | 8.502001 | 0.135221  | 0.029762  |

-----  
Total Energy = -1142.2341676HF

DFT data for *meso*-arylethynyl BODIPY **2e**

Standard orientation:  
-----

Center    Atomic    Atomic    Coordinates (Angstroms)

| Number | Number | Type | X         | Y         | Z         |
|--------|--------|------|-----------|-----------|-----------|
| 1      | 6      | 0    | 2.058509  | 2.696533  | -0.074515 |
| 2      | 1      | 0    | 1.096740  | 3.188910  | -0.090135 |
| 3      | 6      | 0    | 3.319303  | 3.280556  | -0.113173 |
| 4      | 1      | 0    | 3.555662  | 4.333886  | -0.162398 |
| 5      | 6      | 0    | 4.254795  | 2.226123  | -0.083921 |
| 6      | 1      | 0    | 5.335205  | 2.268755  | -0.097670 |
| 7      | 7      | 0    | 3.621089  | 1.042721  | -0.030716 |
| 8      | 5      | 0    | 4.303930  | -0.363521 | 0.107868  |
| 9      | 6      | 0    | 1.996310  | -3.347885 | -0.149356 |
| 10     | 6      | 0    | 1.056266  | -2.324980 | -0.102814 |
| 11     | 1      | 0    | -0.020789 | -2.410369 | -0.121710 |
| 12     | 6      | 0    | 1.775547  | -1.106407 | -0.039181 |
| 13     | 6      | 0    | 1.325122  | 0.231754  | -0.017144 |
| 14     | 6      | 0    | 2.254748  | 1.294630  | -0.024820 |
| 15     | 7      | 0    | 3.133904  | -1.398322 | -0.044832 |
| 16     | 9      | 0    | 5.233227  | -0.543240 | -0.898426 |

|    |   |   |           |           |           |
|----|---|---|-----------|-----------|-----------|
| 17 | 6 | 0 | 3.264831  | -2.733746 | -0.110831 |
| 18 | 1 | 0 | 4.246127  | -3.187733 | -0.126424 |
| 19 | 9 | 0 | 4.876839  | -0.485026 | 1.361120  |
| 20 | 1 | 0 | 1.810270  | -4.410697 | -0.209499 |
| 21 | 6 | 0 | -0.059705 | 0.507855  | -0.011444 |
| 22 | 6 | 0 | -1.255465 | 0.745369  | -0.004689 |
| 23 | 6 | 0 | -2.765932 | 1.045394  | 0.003844  |
| 24 | 6 | 0 | -3.677305 | -0.046174 | 0.011484  |
| 25 | 6 | 0 | -3.227473 | 2.338432  | 0.003377  |
| 26 | 6 | 0 | -3.227505 | -1.395172 | 0.012157  |
| 27 | 6 | 0 | -5.071685 | 0.216198  | 0.018724  |
| 28 | 6 | 0 | -4.619143 | 2.600909  | 0.010692  |
| 29 | 1 | 0 | -2.525302 | 3.185074  | -0.002501 |
| 30 | 6 | 0 | -4.129029 | -2.430443 | 0.019353  |
| 31 | 1 | 0 | -2.144466 | -1.589404 | 0.006571  |
| 32 | 6 | 0 | -5.982982 | -0.875025 | 0.026254  |
| 33 | 6 | 0 | -5.520653 | 1.565549  | 0.018160  |
| 34 | 1 | 0 | -4.964591 | 3.645218  | 0.009977  |



|    |   |   |           |           |          |
|----|---|---|-----------|-----------|----------|
| 35 | 6 | 0 | -5.520536 | -2.168163 | 0.026442 |
| 36 | 1 | 0 | -3.783596 | -3.474792 | 0.019809 |
| 37 | 1 | 0 | -7.062141 | -0.660905 | 0.031627 |
| 38 | 1 | 0 | -6.603639 | 1.760176  | 0.023777 |
| 39 | 1 | 0 | -6.222787 | -3.014748 | 0.032240 |

-----  
Total Energy = -1142.2335905 HF

DFT data for *meso*-arylethynyl BODIPY **2f**

Standard orientation:

-----

| Center | Atomic | Atomic | Coordinates (Angstroms) |           |          |
|--------|--------|--------|-------------------------|-----------|----------|
| Number | Number | Type   | X                       | Y         | Z        |
| 1      | 6      | 0      | -2.348991               | -2.685926 | 0.321721 |
| 2      | 1      | 0      | -1.307306               | -2.973245 | 0.357634 |
| 3      | 6      | 0      | -3.465696               | -3.507336 | 0.418492 |
| 4      | 1      | 0      | -3.484797               | -4.580580 | 0.548599 |
| 5      | 6      | 0      | -4.594391               | -2.669836 | 0.307102 |
| 6      | 1      | 0      | -5.644713               | -2.926831 | 0.337913 |

|    |   |   |           |           |           |
|----|---|---|-----------|-----------|-----------|
| 7  | 7 | 0 | -4.212905 | -1.392463 | 0.145869  |
| 8  | 5 | 0 | -5.163370 | -0.144276 | 0.094492  |
| 9  | 6 | 0 | -3.508365 | 3.144483  | -0.768879 |
| 10 | 6 | 0 | -2.380843 | 2.353548  | -0.582407 |
| 11 | 1 | 0 | -1.343849 | 2.645097  | -0.676481 |
| 12 | 6 | 0 | -2.837812 | 1.048962  | -0.272694 |
| 13 | 6 | 0 | -2.127763 | -0.149483 | -0.043447 |
| 14 | 6 | 0 | -2.823439 | -1.362563 | 0.148116  |
| 15 | 7 | 0 | -4.227507 | 1.060765  | -0.273982 |
| 16 | 9 | 0 | -6.123550 | -0.316170 | -0.882864 |
| 17 | 6 | 0 | -4.625847 | 2.308798  | -0.569211 |
| 18 | 1 | 0 | -5.679447 | 2.547324  | -0.625340 |
| 19 | 9 | 0 | -5.731145 | 0.063893  | 1.337972  |
| 20 | 1 | 0 | -3.541318 | 4.193919  | -1.027203 |
| 21 | 6 | 0 | -0.714705 | -0.141744 | -0.027783 |
| 22 | 6 | 0 | 0.504071  | -0.146533 | -0.005628 |
| 23 | 6 | 0 | 1.923610  | -0.171857 | 0.005577  |
| 24 | 6 | 0 | 2.574229  | -1.372448 | -0.163019 |

|    |   |   |          |           |           |
|----|---|---|----------|-----------|-----------|
| 25 | 6 | 0 | 2.690003 | 1.052841  | 0.178791  |
| 26 | 6 | 0 | 3.996109 | -1.463735 | -0.192359 |
| 27 | 1 | 0 | 1.992327 | -2.280892 | -0.289228 |
| 28 | 6 | 0 | 4.114562 | 0.995675  | 0.152252  |
| 29 | 6 | 0 | 2.045057 | 2.292346  | 0.381524  |
| 30 | 6 | 0 | 4.627628 | -2.718049 | -0.376384 |
| 31 | 6 | 0 | 4.785470 | -0.284562 | -0.040437 |
| 32 | 6 | 0 | 4.827562 | 2.205882  | 0.321222  |
| 33 | 1 | 0 | 0.960558 | 2.314714  | 0.417917  |
| 34 | 6 | 0 | 2.771511 | 3.455784  | 0.545198  |
| 35 | 6 | 0 | 6.002812 | -2.820425 | -0.411964 |
| 36 | 1 | 0 | 4.005474 | -3.602317 | -0.490331 |
| 37 | 6 | 0 | 6.191139 | -0.424917 | -0.082672 |
| 38 | 6 | 0 | 4.175909 | 3.410121  | 0.511620  |
| 39 | 1 | 0 | 5.911593 | 2.199410  | 0.305710  |
| 40 | 1 | 0 | 2.258827 | 4.400568  | 0.701812  |
| 41 | 6 | 0 | 6.787211 | -1.660695 | -0.263726 |
| 42 | 1 | 0 | 6.478513 | -3.786512 | -0.553758 |

|    |   |   |          |           |           |
|----|---|---|----------|-----------|-----------|
| 43 | 1 | 0 | 6.827713 | 0.445757  | 0.027430  |
| 44 | 1 | 0 | 4.753381 | 4.321443  | 0.639178  |
| 45 | 1 | 0 | 7.870849 | -1.734079 | -0.291517 |

---

Total Energy = -1295.8790759 HF

DFT data for *meso*-arylethynyl BODIPY **2g**

Standard orientation:

---

| Center | Atomic | Atomic | Coordinates (Angstroms) |           |           |
|--------|--------|--------|-------------------------|-----------|-----------|
| Number | Number | Type   | X                       | Y         | Z         |
| 1      | 6      | 0      | -2.347029               | -2.349957 | -0.356413 |
| 2      | 1      | 0      | -1.270948               | -2.404794 | -0.445485 |
| 3      | 6      | 0      | -3.261808               | -3.393274 | -0.442051 |
| 4      | 1      | 0      | -3.051709               | -4.442159 | -0.599796 |
| 5      | 6      | 0      | -4.541109               | -2.821495 | -0.294475 |
| 6      | 1      | 0      | -5.511385               | -3.299555 | -0.302232 |
| 7      | 7      | 0      | -4.440566               | -1.492594 | -0.126204 |
| 8      | 5      | 0      | -5.629928               | -0.506943 | 0.150286  |

|    |   |   |           |           |           |
|----|---|---|-----------|-----------|-----------|
| 9  | 6 | 0 | -4.757986 | 3.171344  | 0.135598  |
| 10 | 6 | 0 | -3.481114 | 2.624247  | 0.086919  |
| 11 | 1 | 0 | -2.534730 | 3.146723  | 0.070314  |
| 12 | 6 | 0 | -3.635690 | 1.217216  | 0.045308  |
| 13 | 6 | 0 | -2.676505 | 0.184923  | -0.054093 |
| 14 | 6 | 0 | -3.091434 | -1.161751 | -0.158903 |
| 15 | 7 | 0 | -4.993967 | 0.925296  | 0.073447  |
| 16 | 9 | 0 | -6.600680 | -0.650269 | -0.821705 |
| 17 | 6 | 0 | -5.661538 | 2.089686  | 0.127276  |
| 18 | 1 | 0 | -6.742754 | 2.098931  | 0.159325  |
| 19 | 9 | 0 | -6.139552 | -0.727310 | 1.416941  |
| 20 | 1 | 0 | -5.025040 | 4.218626  | 0.168134  |
| 21 | 6 | 0 | -1.302494 | 0.506415  | -0.069487 |
| 22 | 6 | 0 | -0.117300 | 0.797200  | -0.070116 |
| 23 | 6 | 0 | 1.249214  | 1.168251  | -0.077977 |
| 24 | 6 | 0 | 2.283115  | 0.190577  | 0.001294  |
| 25 | 6 | 0 | 1.587831  | 2.535656  | -0.170905 |
| 26 | 6 | 0 | 3.643469  | 0.621835  | -0.024603 |

|    |   |   |          |           |           |
|----|---|---|----------|-----------|-----------|
| 27 | 6 | 0 | 2.009020 | -1.211673 | 0.112330  |
| 28 | 6 | 0 | 2.908842 | 2.946882  | -0.194314 |
| 29 | 1 | 0 | 0.787893 | 3.266908  | -0.228556 |
| 30 | 6 | 0 | 4.697133 | -0.338510 | 0.049672  |
| 31 | 6 | 0 | 3.958808 | 2.012132  | -0.124380 |
| 32 | 6 | 0 | 3.016314 | -2.127174 | 0.183638  |
| 33 | 1 | 0 | 0.972944 | -1.532041 | 0.147201  |
| 34 | 1 | 0 | 3.145229 | 4.004990  | -0.269016 |
| 35 | 6 | 0 | 4.393848 | -1.729025 | 0.152762  |
| 36 | 6 | 0 | 6.059835 | 0.088332  | 0.022302  |
| 37 | 6 | 0 | 5.335608 | 2.411541  | -0.149101 |
| 38 | 1 | 0 | 2.785819 | -3.186234 | 0.268570  |
| 39 | 6 | 0 | 5.446859 | -2.656398 | 0.223759  |
| 40 | 6 | 0 | 7.079012 | -0.875200 | 0.095632  |
| 41 | 6 | 0 | 6.339856 | 1.492629  | -0.079490 |
| 42 | 1 | 0 | 5.563677 | 3.471592  | -0.225594 |
| 43 | 6 | 0 | 6.773495 | -2.231623 | 0.194824  |
| 44 | 1 | 0 | 5.214525 | -3.715448 | 0.302722  |

|    |   |   |          |           |           |
|----|---|---|----------|-----------|-----------|
| 45 | 1 | 0 | 8.116281 | -0.550366 | 0.074296  |
| 46 | 1 | 0 | 7.378762 | 1.812482  | -0.099735 |
| 47 | 1 | 0 | 7.575403 | -2.962352 | 0.250574  |

-----  
Total Energy = -1372.1153225 HF

DFT data for *meso*-arylethynyl BODIPY **2h**

Standard orientation:

-----

| Center | Atomic | Atomic | Coordinates (Angstroms) |           |           |
|--------|--------|--------|-------------------------|-----------|-----------|
| Number | Number | Type   | X                       | Y         | Z         |
| 1      | 6      | 0      | -2.004628               | -2.420783 | -0.810645 |
| 2      | 1      | 0      | -0.964612               | -2.689306 | -0.935439 |
| 3      | 6      | 0      | -3.124070               | -3.202512 | -1.071836 |
| 4      | 1      | 0      | -3.146101               | -4.221693 | -1.432334 |
| 5      | 6      | 0      | -4.249908               | -2.403614 | -0.788480 |
| 6      | 1      | 0      | -5.300932               | -2.646541 | -0.868599 |
| 7      | 7      | 0      | -3.864384               | -1.186586 | -0.370467 |
| 8      | 5      | 0      | -4.815163               | -0.027555 | 0.093638  |

|    |   |   |           |           |           |
|----|---|---|-----------|-----------|-----------|
| 9  | 6 | 0 | -3.148561 | 3.282050  | 0.840548  |
| 10 | 6 | 0 | -2.023216 | 2.488649  | 0.649735  |
| 11 | 1 | 0 | -0.985216 | 2.777211  | 0.742055  |
| 12 | 6 | 0 | -2.483825 | 1.193455  | 0.308595  |
| 13 | 6 | 0 | -1.775712 | 0.016100  | -0.018366 |
| 14 | 6 | 0 | -2.475236 | -1.159420 | -0.370462 |
| 15 | 7 | 0 | -3.873270 | 1.210753  | 0.303000  |
| 16 | 9 | 0 | -5.747910 | 0.243189  | -0.888322 |
| 17 | 6 | 0 | -4.268110 | 2.455191  | 0.619042  |
| 18 | 1 | 0 | -5.321012 | 2.696312  | 0.676863  |
| 19 | 9 | 0 | -5.418873 | -0.363756 | 1.291413  |
| 20 | 1 | 0 | -3.178410 | 4.329692  | 1.106484  |
| 21 | 6 | 0 | -0.363957 | 0.017880  | -0.013865 |
| 22 | 6 | 0 | 0.856473  | 0.013063  | -0.006700 |
| 23 | 6 | 0 | 2.271904  | 0.002711  | 0.002090  |
| 24 | 6 | 0 | 2.966020  | -1.223881 | 0.213777  |
| 25 | 6 | 0 | 2.988659  | 1.217585  | -0.200659 |
| 26 | 6 | 0 | 2.291525  | -2.459568 | 0.436491  |



|    |   |   |          |           |           |
|----|---|---|----------|-----------|-----------|
| 27 | 6 | 0 | 4.406856 | -1.223001 | 0.216986  |
| 28 | 6 | 0 | 4.429191 | 1.193275  | -0.185096 |
| 29 | 6 | 0 | 2.337456 | 2.463952  | -0.432399 |
| 30 | 6 | 0 | 2.994022 | -3.621951 | 0.634716  |
| 31 | 1 | 0 | 1.206715 | -2.464768 | 0.457567  |
| 32 | 6 | 0 | 5.101325 | -2.454443 | 0.426708  |
| 33 | 6 | 0 | 5.095612 | -0.020373 | 0.020436  |
| 34 | 6 | 0 | 5.146224 | 2.413247  | -0.385782 |
| 35 | 1 | 0 | 1.253229 | 2.486226  | -0.467528 |
| 36 | 6 | 0 | 3.061097 | 3.614748  | -0.621718 |
| 37 | 6 | 0 | 4.416758 | -3.623553 | 0.627892  |
| 38 | 1 | 0 | 2.459612 | -4.552805 | 0.802891  |
| 39 | 1 | 0 | 6.188388 | -2.440382 | 0.425179  |
| 40 | 1 | 0 | 6.183603 | -0.029228 | 0.027623  |
| 41 | 6 | 0 | 4.483469 | 3.593262  | -0.596105 |
| 42 | 1 | 0 | 6.232799 | 2.381604  | -0.369941 |
| 43 | 1 | 0 | 2.544151 | 4.554149  | -0.796866 |
| 44 | 1 | 0 | 4.954122 | -4.554033 | 0.786968  |

45 1 0 5.037905 4.514869 -0.748073

---

Total Energy = -1295.8719177 HF

---

(1) U. Resch-Genger, and P. C. DeRose, *Pure Appl. Chem.*, 2010, **82**, 2315–2335.

(2) (a) A. D. Becke, *J. Chem. Phys.*, 1993, **98**, 5648-5652; (b) C. T. Lee, W. T. Yang and R. G. Parr, *Phys. Rev. B*, 1988, **37**, 785-789; (c) P. J. Hay and W. R. Wadt, *J. Chem. Phys.* 1985, **82**, 270-283; (d) M. M. Francl, W. J. Pietro, W. J. Hehre, J. S. Binkley, M.S. Gordon, D. J. Defrees and J. A. Pople, *J. Chem. Phys.* 1982, **77**, 3654-3665.
